# Supplementary material for: Expanding the scope of novel 1,2,3-triazole derivatives as new antiparasitic drug candidates
Source: Royal Society of Chemistry journal article supplement (doi:10.1039/d2md00324d), 2022-10-31
Supplement: d2md00324d1.pdf [file d2md00324d1.pdf]

Supporting Information for

## Expanding the scope of novel 1,2,3-triazole derivatives as new antiparasitic drug candidates

Renzo Carlucci,<sup>a,‡</sup> Gabriel Di Gresia,<sup>a,‡</sup> María Gabriela Mediavilla,<sup>b</sup> Julia A. Cricco,<sup>b</sup> Babu Tekwani,<sup>c</sup> Shabana I. Khan,<sup>d</sup> and Guillermo R. Labadie.<sup>a,d,\*</sup>

<sup>a</sup> *Instituto de Química Rosario (IQUIR-CONICET), Facultad de Ciencias Bioquímicas y Farmacéuticas, Universidad Nacional de Rosario. Suipacha 531, S2002LRK, Rosario, ARGENTINA.*

<sup>b</sup> *Instituto de Biología Molecular y Celular de Rosario (IBR), Suipacha 531, S2002LRK, Rosario, Argentina*

<sup>c</sup> *Department of Infectious Diseases, Scientific Platforms, Southern Research, Birmingham, AL 35205, USA*

<sup>d</sup> *National Center for Natural Products Research & Department of Pharmacology, School of Pharmacy, University of Mississippi, University MS 38677, USA.*

<sup>e</sup> *Departamento de Química Orgánica, Facultad de Ciencias Bioquímicas y Farmacéuticas, Universidad Nacional de Rosario, Suipacha 531, S2002LRK, Rosario, ARGENTINA.*

<sup>‡</sup> equal contribution

\* Corresponding author: Instituto de Química Rosario (IQUIR-CONICET), Facultad de Ciencias Bioquímicas y Farmacéuticas, Universidad Nacional de Rosario. Suipacha 531, S2002LRK, Rosario, ARGENTINA. Tel/Fax: +54-341-4370477 E-mail: [labadie@iquir-conicet.gov.ar](mailto:labadie@iquir-conicet.gov.ar)

## Table of Contents

|                                                                        |    |
|------------------------------------------------------------------------|----|
| General Information.....                                               | 3  |
| Table S1. SMILES of compounds tested on this work. ....                | 4  |
| Copies of Spectra.....                                                 | 6  |
| Compound 1k.....                                                       | 6  |
| Compound 1l.....                                                       | 9  |
| Compound 1m.....                                                       | 12 |
| Compound 1n.....                                                       | 15 |
| Compound 1o.....                                                       | 18 |
| Compound 1p.....                                                       | 21 |
| Compound 1q.....                                                       | 24 |
| Compound 1r.....                                                       | 27 |
| Compound 4a.....                                                       | 30 |
| Compound 4b.....                                                       | 33 |
| Compound 4c.....                                                       | 36 |
| Compound 4d.....                                                       | 39 |
| Compound 4e.....                                                       | 42 |
| Compound 5h.....                                                       | 45 |
| Compound 6a.....                                                       | 48 |
| Compound 7c.....                                                       | 51 |
| Compound 7d.....                                                       | 54 |
| Compound 7e.....                                                       | 57 |
| Compound 7g.....                                                       | 60 |
| Compound 7h.....                                                       | 63 |
| Physicochemical properties calculated in DATAWARRIOR.....              | 66 |
| Physicochemical properties calculated in Osiris and Molinpiration..... | 68 |
| Physicochemical properties of active compounds.....                    | 70 |

## General Information.

All reactions progress was monitored on GP TLC plates. Column chromatography was performed with silica gel 60 (230-400 mesh) under a low pressure of nitrogen, using increasing EtOAc-hexane gradients as a solvent. All the solvents (hexane, ethyl acetate) were distilled before use. Chemical reagents were purchased from commercial suppliers and used without further purification, unless otherwise noted. Solvents were analytical grade or were purified by standard procedures prior to use.  $^1\text{H}$  and  $^{13}\text{C}$  NMR spectra were measured on a 300 MHz Bruker Avance II using  $\text{CDCl}_3$  as a solvent. Chemical shifts were reported in ppm downfield from tetramethylsilane ( $\delta$ ) as the internal standards and coupling constants are in hertz (Hz). Assignments of proton resonances were confirmed by correlated spectroscopy (Heteronuclear Single Quantum Coherence, HSQC). The following abbreviations are used to indicate NMR signal multiplicities: s = singlet, d = doublet, t = triplet, q = quartet, p = pentet, m = multiplet. High-resolution mass spectra (HRMS) were recorded on a Bruker MicroTOF II spray source. All the melting points were determined in open Pyrex capillaries with an Electrothermal 9000 melting point apparatus.

**Table S1.** SMILES of compounds tested on this work.

| Compound | Smile                                                             |
|----------|-------------------------------------------------------------------|
| 1a       | <chem>C/C(CC\C=C(C)/C)=C\CC/C(C)=C/CN1N=NC(C(OC)=O)=C1</chem>     |
| 1b       | <chem>C/C(CC/C=C(C)/C)=C\CC/C(C)=C\CN1N=NC(C(OC)=O)=C1</chem>     |
| 1c       | <chem>C/C(CC\C=C(C)/C)=C\CC/C(C)=C/CN1N=NC(C2=CC=CC=C2)=C1</chem> |
| 1d       | <chem>C/C(CC\C=C(C)/C)=C\CC/C(C)=C\CN1N=NC(C2=CC=CC=C2)=C1</chem> |
| 1e       | <chem>C/C(CC\C=C(C)/C)=C\CC/C(C)=C/CN1N=NC(CCC)=C1</chem>         |
| 1f       | <chem>C/C(CC\C=C(C)/C)=C\CC/C(C)=C\CN1N=NC(CCC)=C1</chem>         |
| 1g       | <chem>C/C(CC\C=C(C)/C)=C\CC/C(C)=C/CN1N=NC(CCCCC)=C1</chem>       |
| 1h       | <chem>C/C(CC\C=C(C)/C)=C\CC/C(C)=C\CN1N=NC(CCCCC)=C1</chem>       |
| 1i       | <chem>C/C(CC\C=C(C)/C)=C\CC/C(C)=C/CN1N=NC(CCCCCCCC)=C1</chem>    |
| 1j       | <chem>C/C(CC\C=C(C)/C)=C\CC/C(C)=C\CN1N=NC(CCCCCCCC)=C1</chem>    |
| 1k       | <chem>C/C(CC\C=C(C)/C)=C\CC/C(C)=C/CN1N=NC(CO)=C1</chem>          |
| 1l       | <chem>C/C(C)=C\CC/C(C)=C/CC/C(C)=C\Cn1nnc(CO)c1</chem>            |
| 1m       | <chem>C/C(CC\C=C(C)/C)=C\CC/C(C)=C/CN1N=NC(C(C)O)=C1</chem>       |
| 1n       | <chem>CC(c1nnn(C/C=C(CC/C=C(CC/C=C(C)\C)\C)/C)c1)O</chem>         |
| 1o       | <chem>C/C(CC\C=C(C)/C)=C\CC/C(C)=C/CN1N=NC(C(C)O)=C1</chem>       |
| 1p       | <chem>C/C(C)=C\CC/C(C)=C/CC/C(C)=C\Cn1nnc(C(C)O)c1</chem>         |
| 1q       | <chem>C/C(CC\C=C(C)/C)=C\CC/C(C)=C/CN1N=NC(CCO)=C1</chem>         |
| 1r       | <chem>C/C(C)=C\CC/C(C)=C/CC/C(C)=C\Cn1nnc(CCO)c1</chem>           |
| 2a       | <chem>C/C(C)=C/CC/C(C)=C/CN1N=NC(C(OC)=O)=C1</chem>               |
| 2b       | <chem>C/C(C)=C/CC/C(C)=C\CN1N=NC(C(OC)=O)=C1</chem>               |
| 2c       | <chem>C/C(C)=C/CC/C(C)=C/CN1N=NC(C2=CC=CC=C2)=C1</chem>           |
| 2d       | <chem>C/C(C)=C/CC/C(C)=C\CN1N=NC(C2=CC=CC=C2)=C1</chem>           |
| 2e       | <chem>C/C(C)=C/CC/C(C)=C/CN1N=NC(CCC)=C1</chem>                   |
| 2f       | <chem>C/C(C)=C/CC/C(C)=C\CN1N=NC(CCC)=C1</chem>                   |
| 2g       | <chem>C/C(C)=C/CC/C(C)=C/CN1N=NC(CCCCC)=C1</chem>                 |
| 2h       | <chem>C/C(C)=C/CC/C(C)=C\CN1N=NC(CCCCC)=C1</chem>                 |
| 2i       | <chem>C/C(C)=C/CC/C(C)=C/CN1N=NC(CCCCCCCC)=C1</chem>              |
| 2j       | <chem>C/C(C)=C/CC/C(C)=C\CN1N=NC(CCCCCCCC)=C1</chem>              |
| 3a       | <chem>C/C(C)=C/CN1N=NC(C(OC)=O)=C1</chem>                         |
| 3b       | <chem>C/C(C)=C/CN1N=NC(C2=CC=CC=C2)=C1</chem>                     |
| 3c       | <chem>C/C(C)=C/CN1N=NC(CCC)=C1</chem>                             |
| 3d       | <chem>C/C(C)=C/CN1N=NC(CCCCC)=C1</chem>                           |

**Table S1 (cont').** SMILES of compounds tested on this work.

| Compound | Smile                                                  |
|----------|--------------------------------------------------------|
| 3e       | <chem>C/C(C)=C/CN1N=NC(CCCCCCCC)=C1</chem>             |
| 4a       | <chem>C1(C3=CN(N=N3)C/C=C/C2=CC=CC=C2)=CC=CC=C1</chem> |
| 4b       | <chem>CCCC2=CN(N=N2)C/C=C/C1=CC=CC=C1</chem>           |
| 4c       | <chem>CCCCC2=CN(N=N2)C/C=C/C1=CC=CC=C1</chem>          |
| 4d       | <chem>CCCCCCCC2=CN(N=N2)C/C=C/C1=CC=CC=C1</chem>       |
| 4e       | <chem>CCCCCCCCC2=CN(N=N2)C/C=C/C1=CC=CC=C1</chem>      |
| 5a       | <chem>O=C(C2=CN(N=N2)CC1=CC=CC=C1)OC</chem>            |
| 5b       | <chem>C1(CN2N=NC(C3=CC=CC=C3)=C2)=CC=CC=C1</chem>      |
| 5c       | <chem>CCCC2=CN(N=N2)CC1=CC=CC=C1</chem>                |
| 5d       | <chem>CCCCC2=CN(N=N2)CC1=CC=CC=C1</chem>               |
| 5e       | <chem>CCCCCCCC2=CN(N=N2)CC1=CC=CC=C1</chem>            |
| 5f       | <chem>O=C(C2=CN(N=N2)CC1=CC=CC=C1)O</chem>             |
| 5g       | <chem>OCC2=CN(N=N2)CC1=CC=CC=C1</chem>                 |
| 5h       | <chem>CCCCCCCCC2=CN(N=N2)CC1=CC=CC=C1</chem>           |
| 6a       | <chem>CCOC(CCN(N=N1)C=C1C(OC)=O)=O</chem>              |
| 6b       | <chem>CCOC(CN1N=NC(CCC)=C1)=O</chem>                   |
| 6c       | <chem>O=C(CN1N=NC(CCCCC)=C1)OCC</chem>                 |
| 6d       | <chem>CCOC(CN1N=NC(CCCCCCCC)=C1)=O</chem>              |
| 7a       | <chem>O=C(C2=CN(N=N2)CCCC1=CC=CC=C1)OC</chem>          |
| 7b       | <chem>C(Cc1cccc1)Cn3cc(c2cccc2)nn3</chem>              |
| 7c       | <chem>CCCC2=CN(N=N2)CCCC1=CC=CC=C1</chem>              |
| 7d       | <chem>CCCCC2=CN(N=N2)CCCC1=CC=CC=C1</chem>             |
| 7e       | <chem>CCCCCCCC2=CN(N=N2)CCCC1=CC=CC=C1</chem>          |
| 7f       | <chem>OCC2=CN(N=N2)CCCC1=CC=CC=C1</chem>               |
| 7g       | <chem>CCCCCCCCC2=CN(N=N2)CCCC1=CC=CC=C1</chem>         |
| 7h       | <chem>CC(O)c2cn(CCCc1cccc1)nn2</chem>                  |
| 8a       | <chem>O=C(OC)C1=CN(N=N1)CCCCCCCC</chem>                |
| 8b       | <chem>OCC1=CN(N=N1)CCCCCCCC</chem>                     |
| 9a       | <chem>O=C(OC)C1=CN(N=N1)CCCCCCCCC</chem>               |
| 9b       | <chem>OCC1=CN(N=N1)CCCCCCCCC</chem>                    |
| 10a      | <chem>O=C(OC)C1=CN(N=N1)CCCCCCCCCCCC</chem>            |
| 10b      | <chem>OCC1=CN(N=N1)CCCCCCCCCCCC</chem>                 |



$^{13}\text{C}$  NMR (75 MHz,  $\text{CDCl}_3$ )

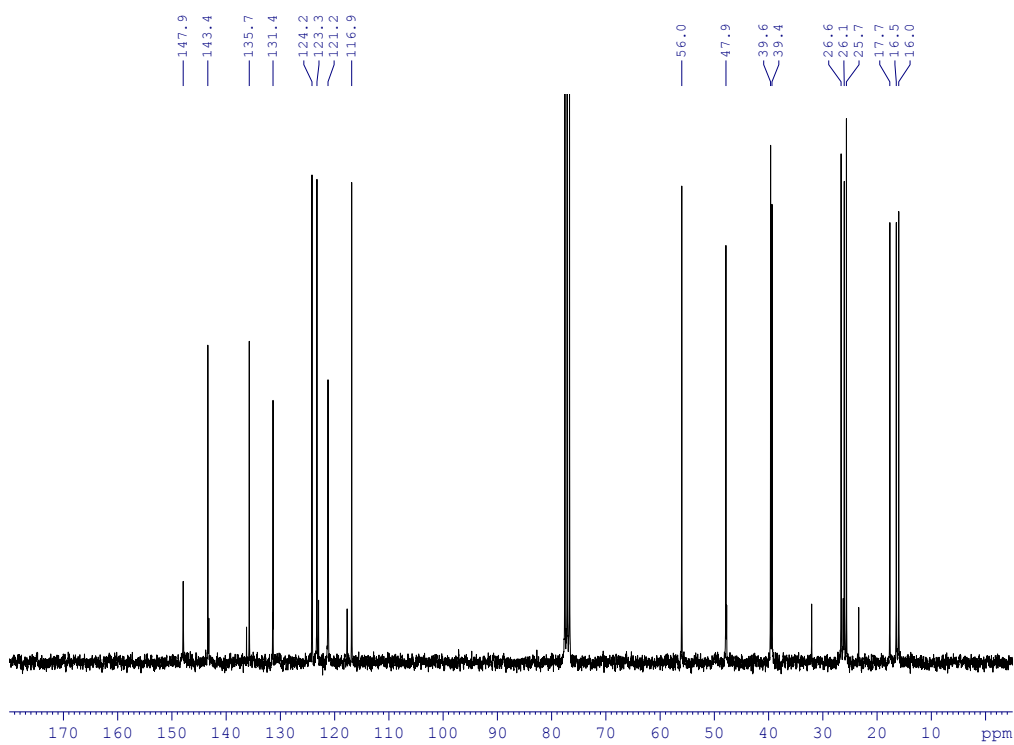

HSQC (CDCl<sub>3</sub>)

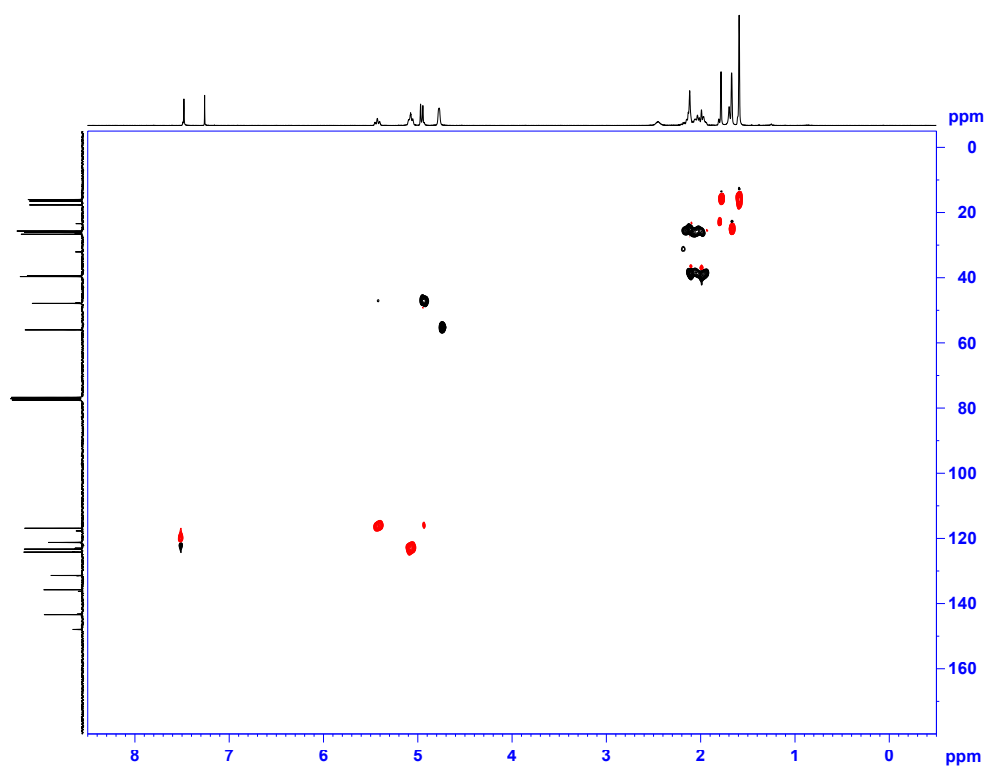





$^{13}\text{C}$  NMR (75 MHz,  $\text{CDCl}_3$ )

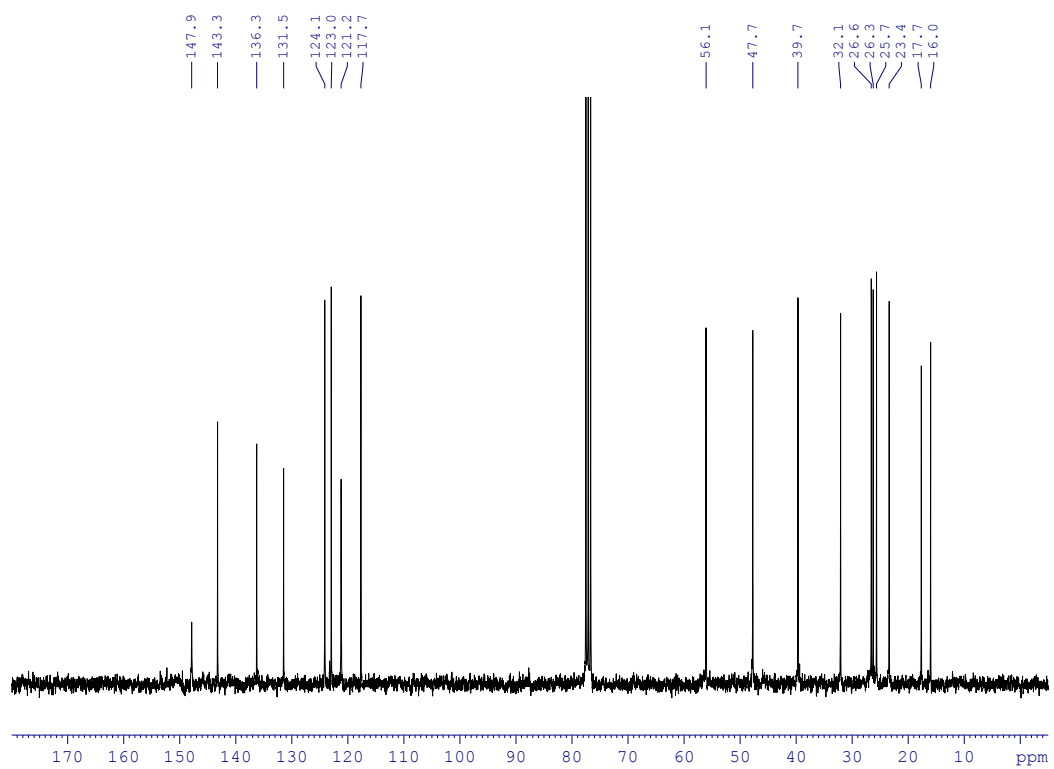

HSQC (CDCl<sub>3</sub>)

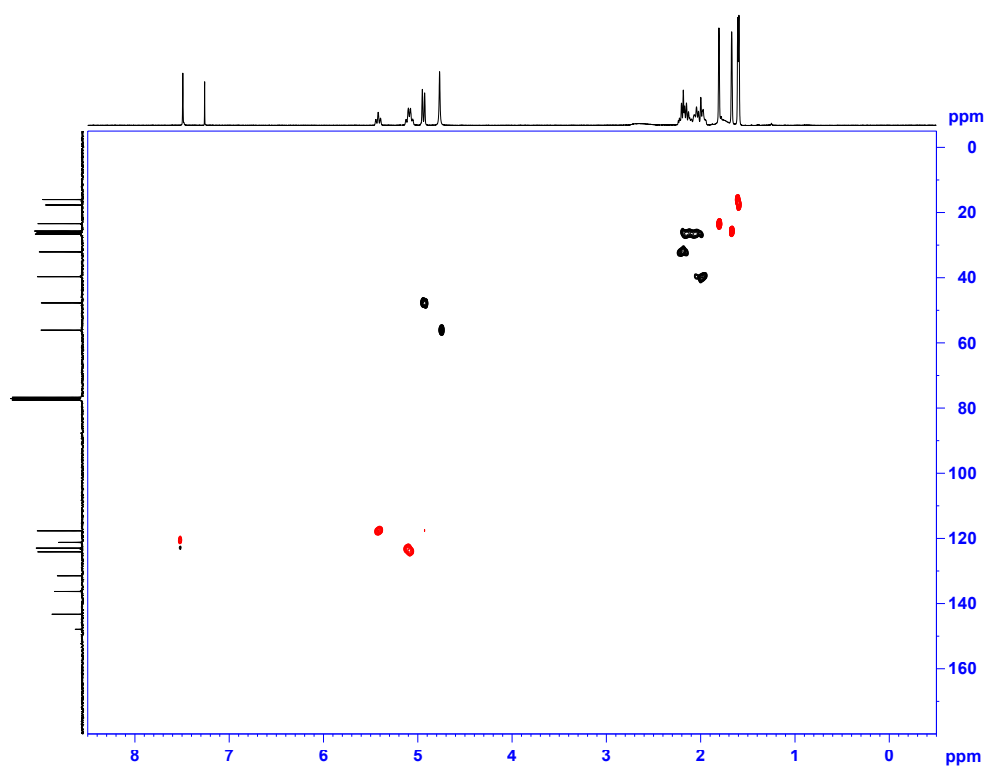

# Compound 1m

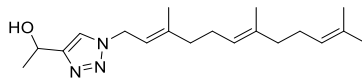

$^1\text{H}$  NMR (300 MHz,  $\text{CDCl}_3$ )

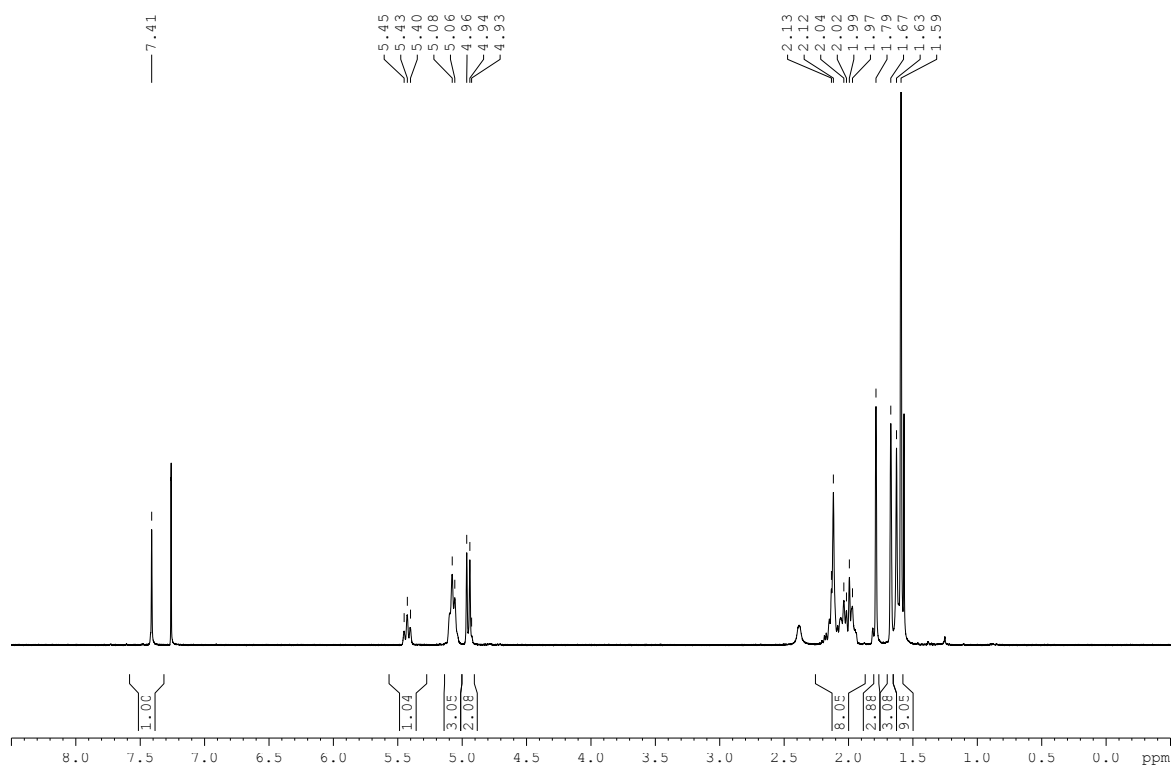

$^{13}\text{C}$  NMR (75 MHz,  $\text{CDCl}_3$ )

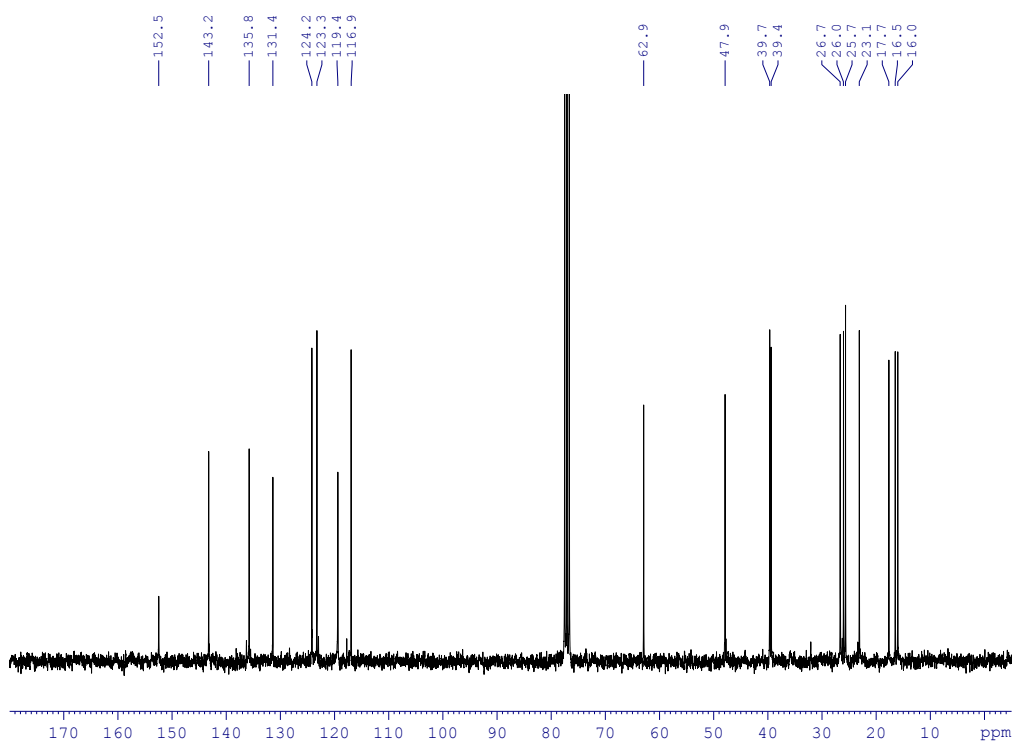

HSQC (CDCl<sub>3</sub>)

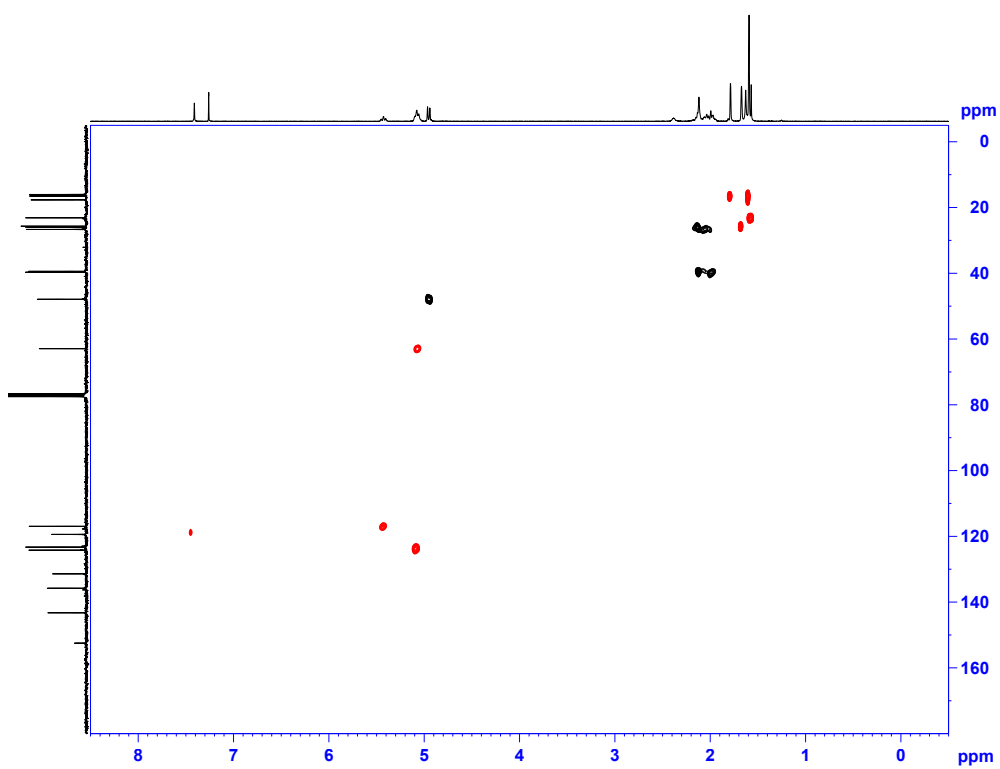

# Compound 1n

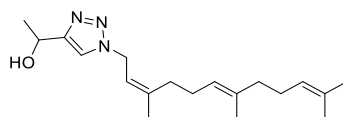

<sup>1</sup>H NMR (300 MHz, CDCl<sub>3</sub>)

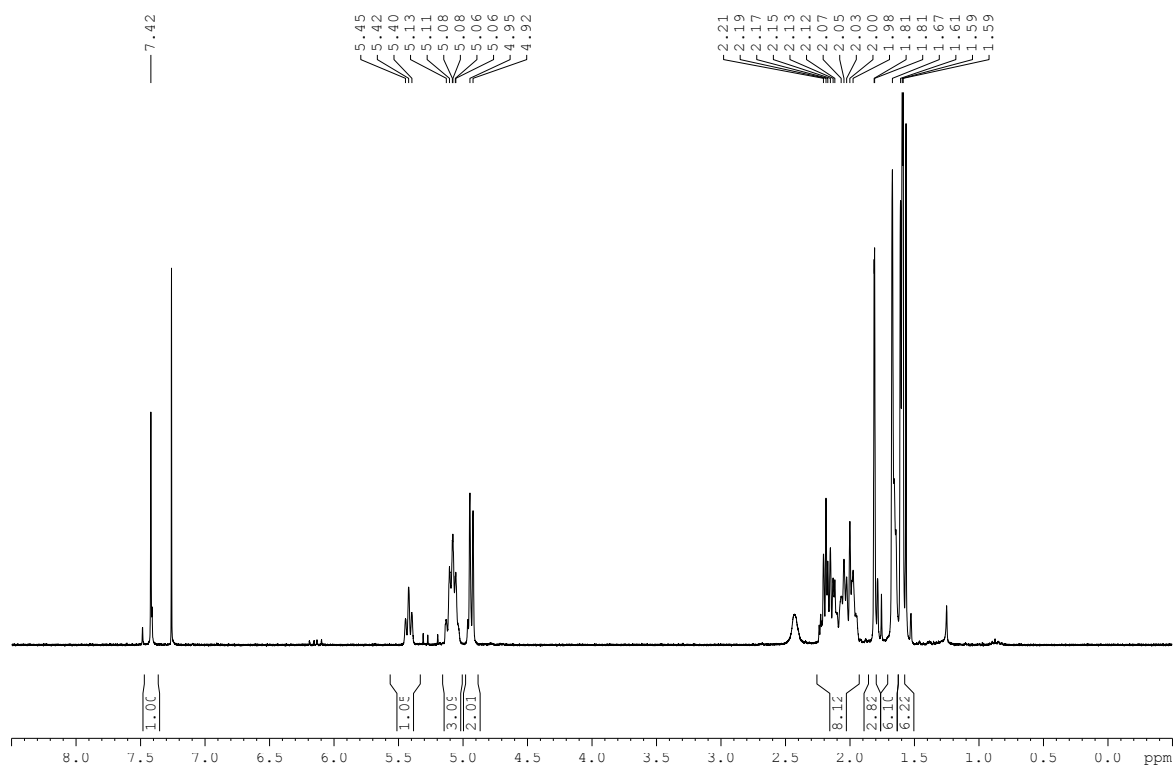

$^{13}\text{C}$  NMR (75 MHz,  $\text{CDCl}_3$ )

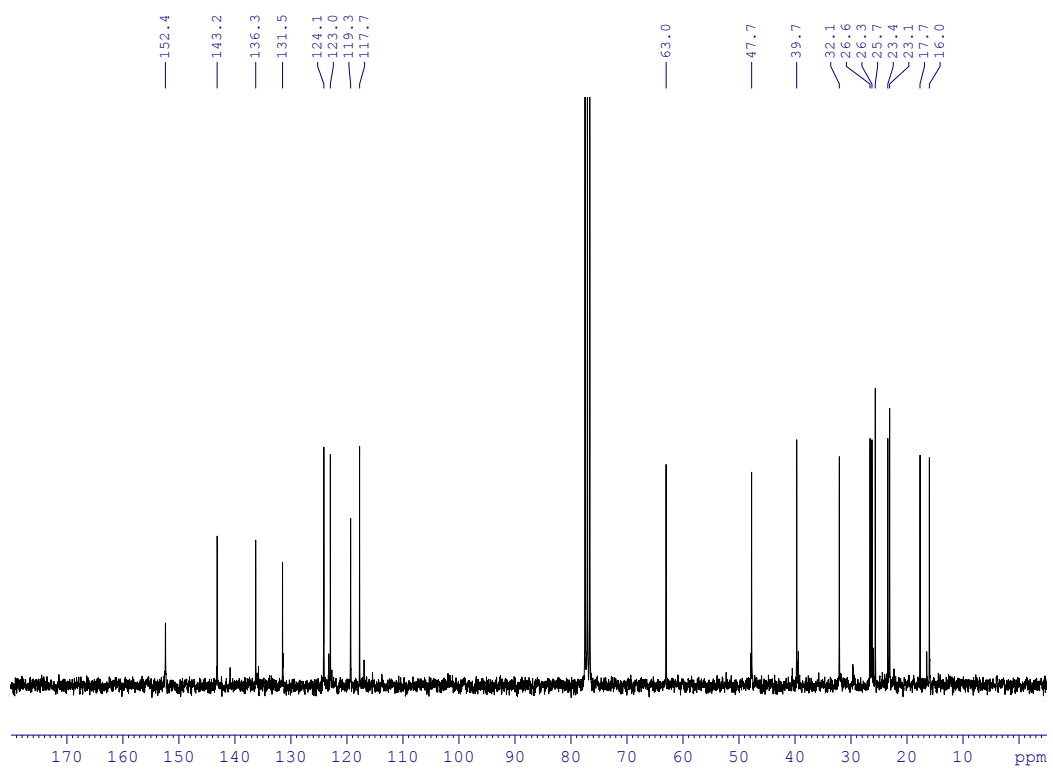



HSQC (CDCl<sub>3</sub>)

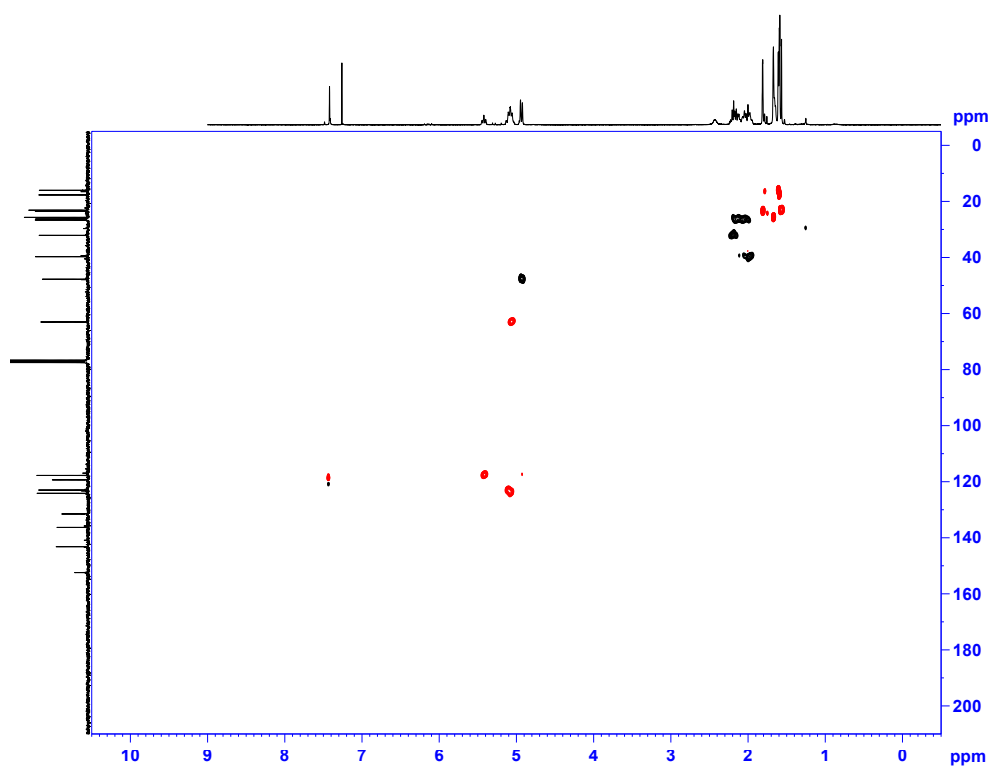

# Compound 1o

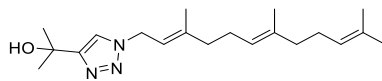

$^1\text{H}$  NMR (300 MHz,  $\text{CDCl}_3$ )

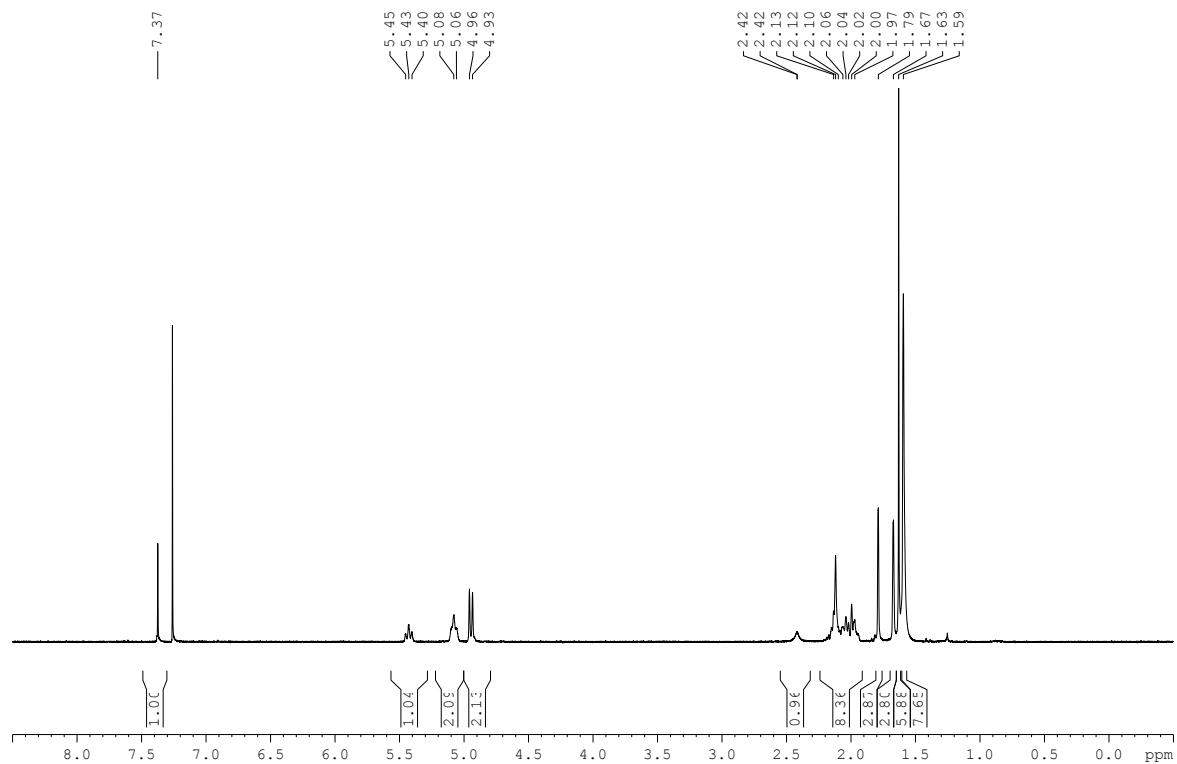

$^{13}\text{C}$  NMR (75 MHz,  $\text{CDCl}_3$ )

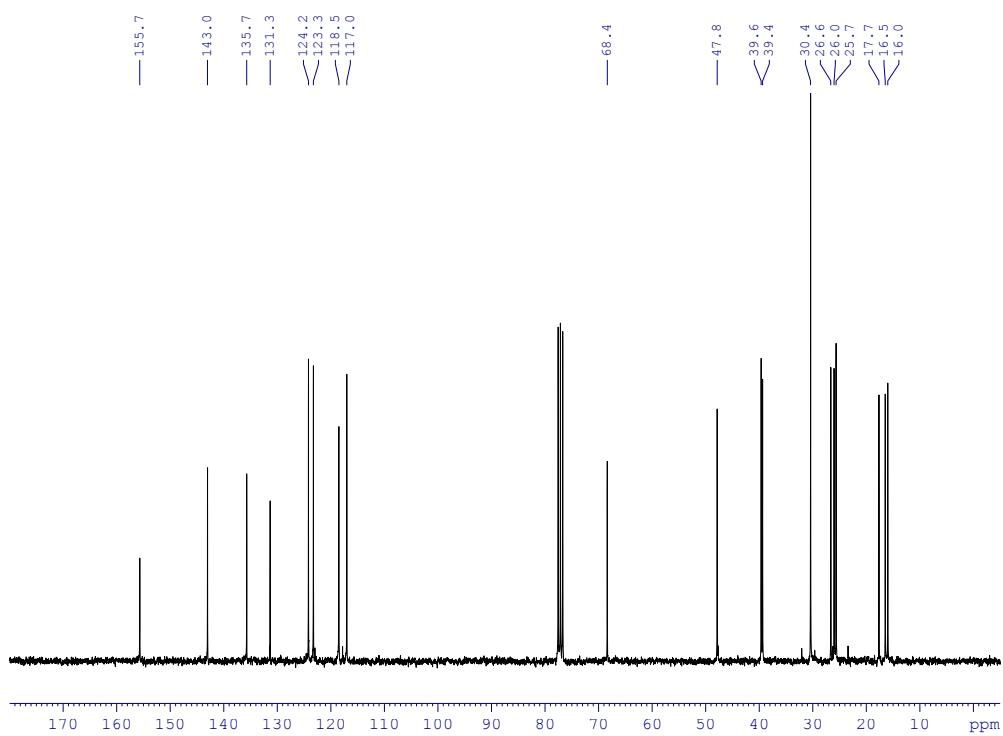

HSQC (CDCl<sub>3</sub>)

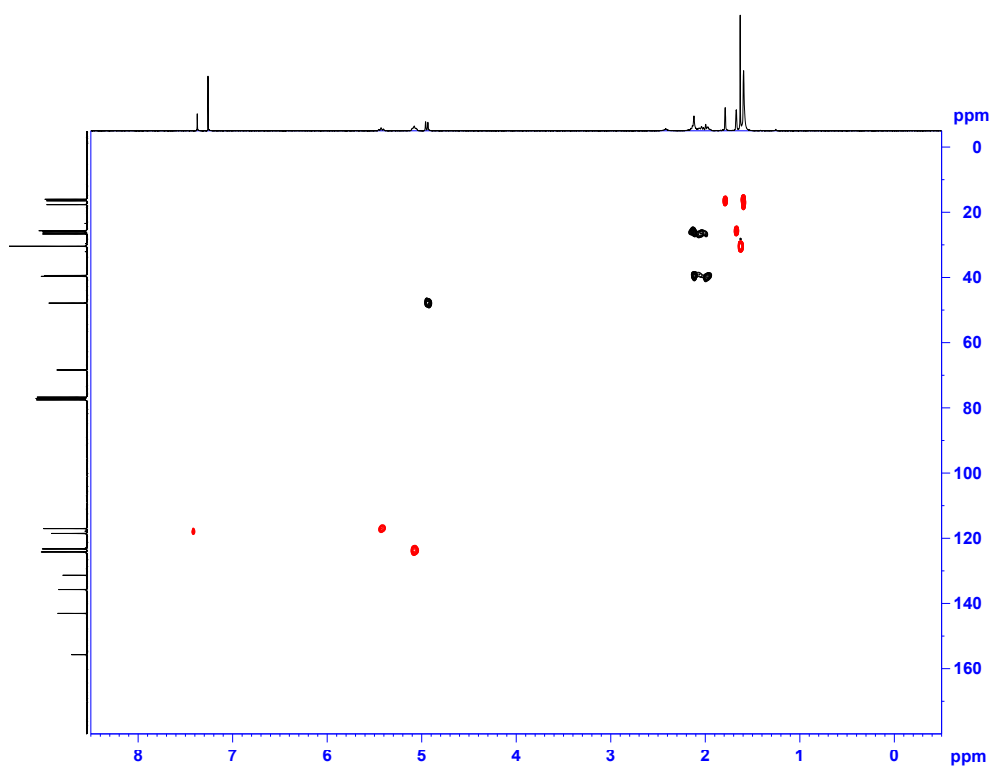

# Compound 1p

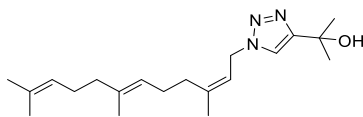

$^1\text{H}$  NMR (300 MHz,  $\text{CDCl}_3$ )

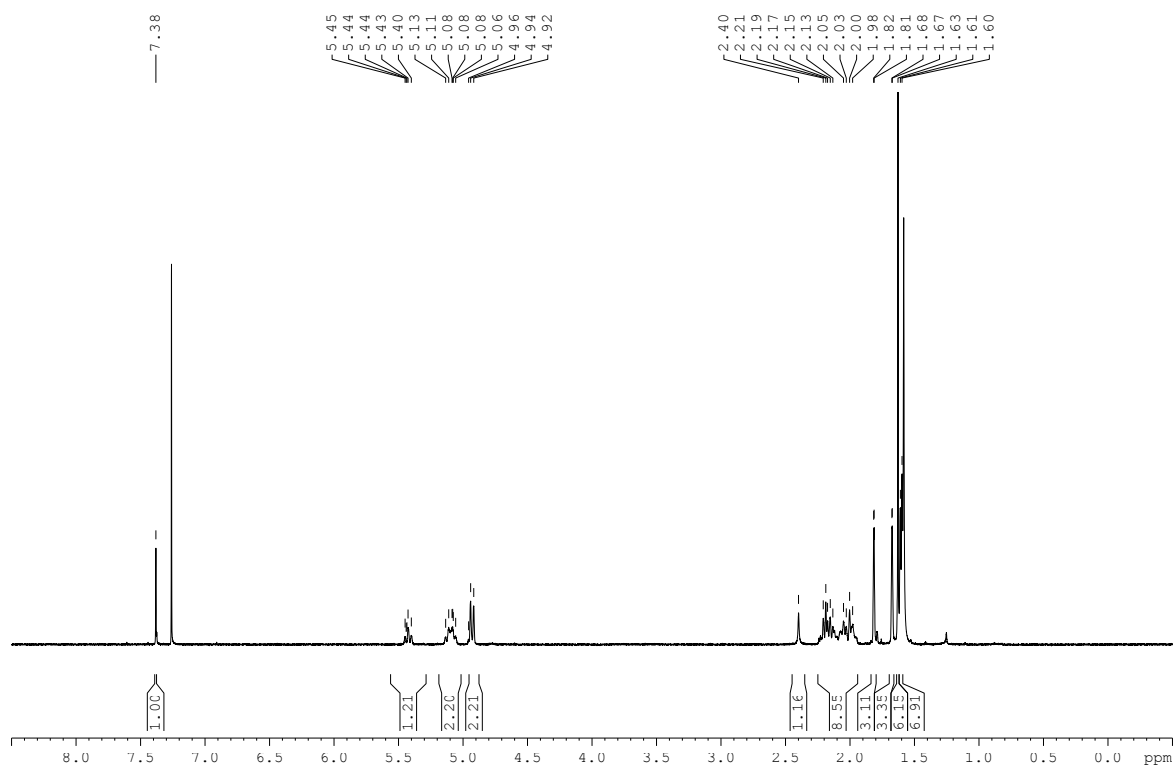

$^{13}\text{C}$  NMR (75 MHz,  $\text{CDCl}_3$ )

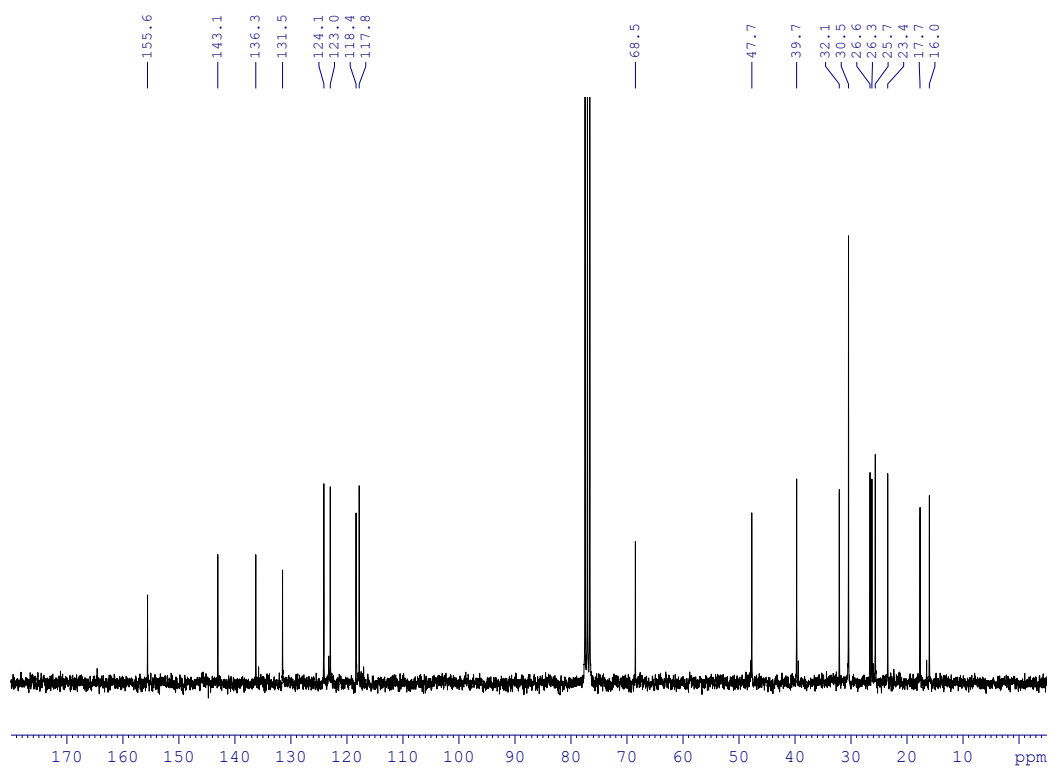

HSQC (CDCl<sub>3</sub>)

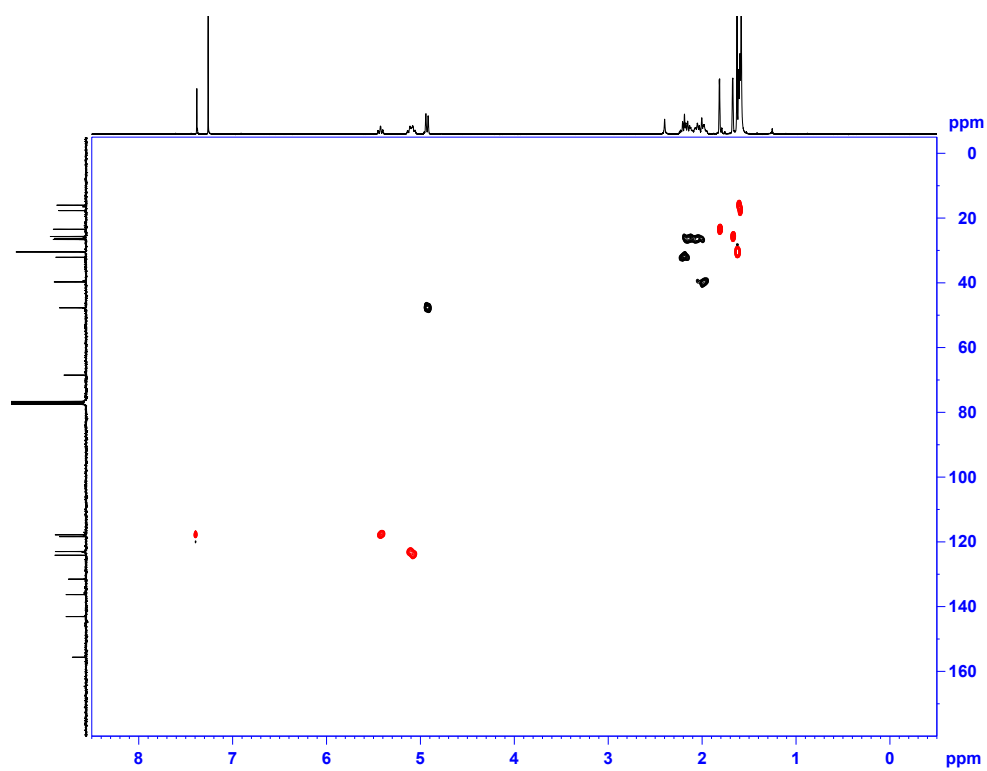

# Compound 1q

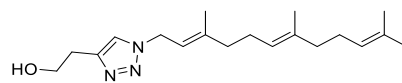

$^1\text{H}$  NMR (300 MHz,  $\text{CDCl}_3$ )

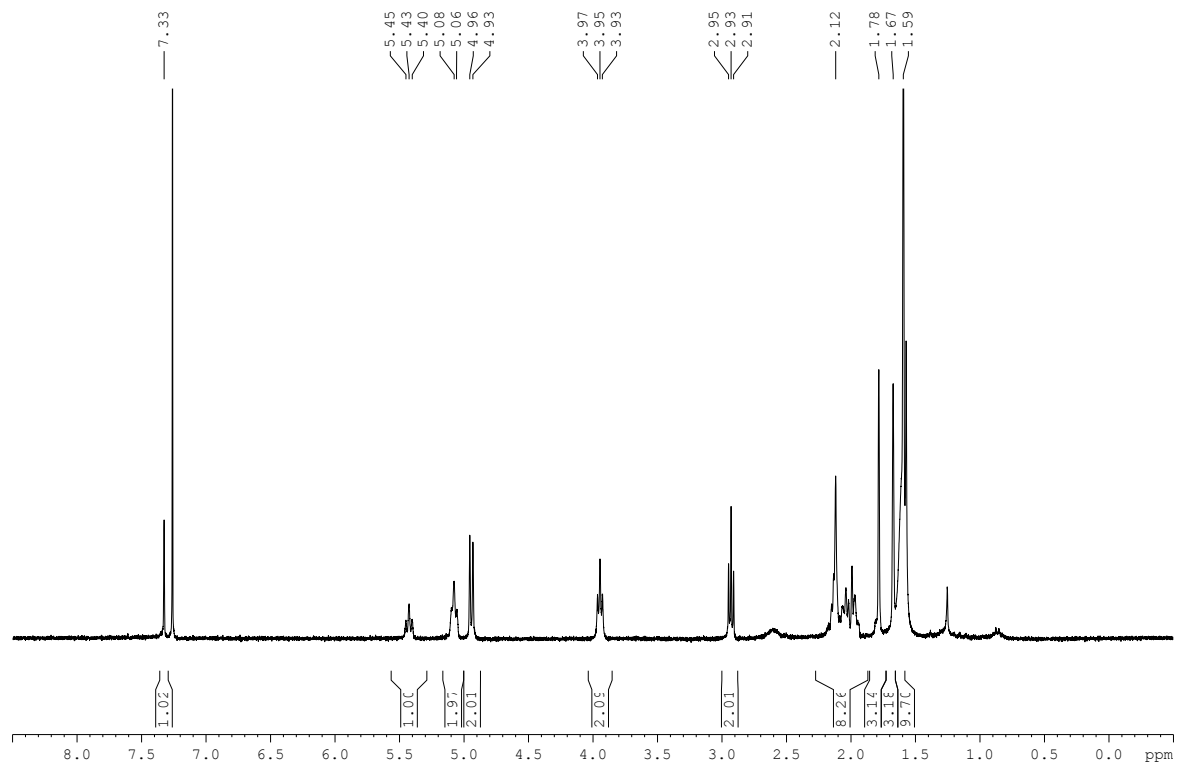



$^{13}\text{C}$  NMR (75 MHz,  $\text{CDCl}_3$ )

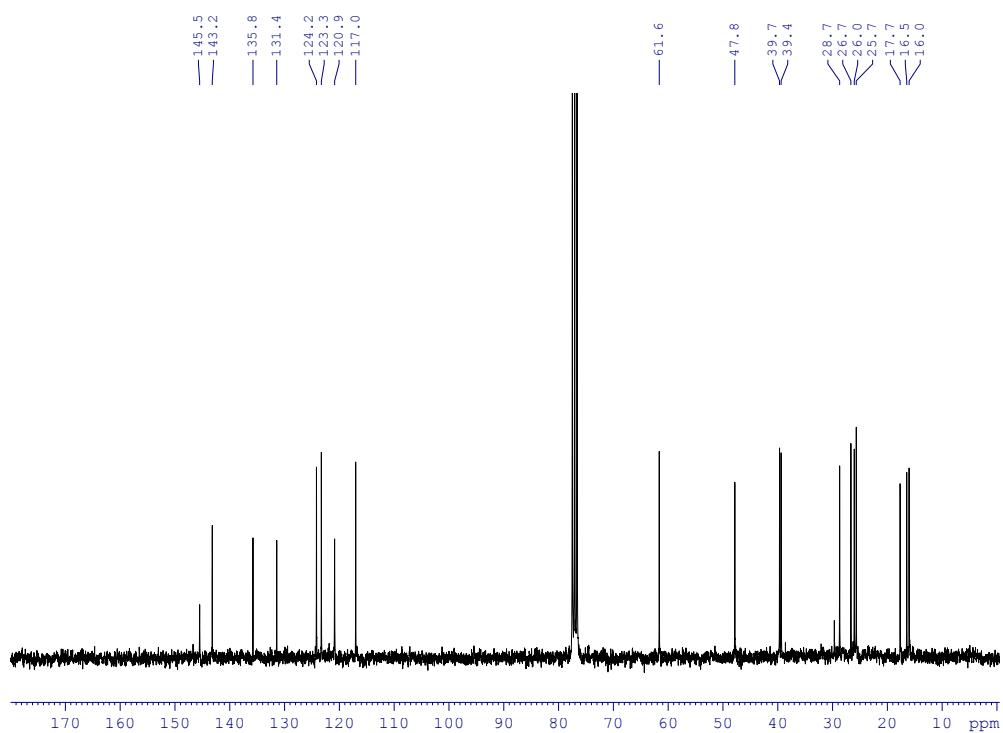

HSQC (CDCl<sub>3</sub>)

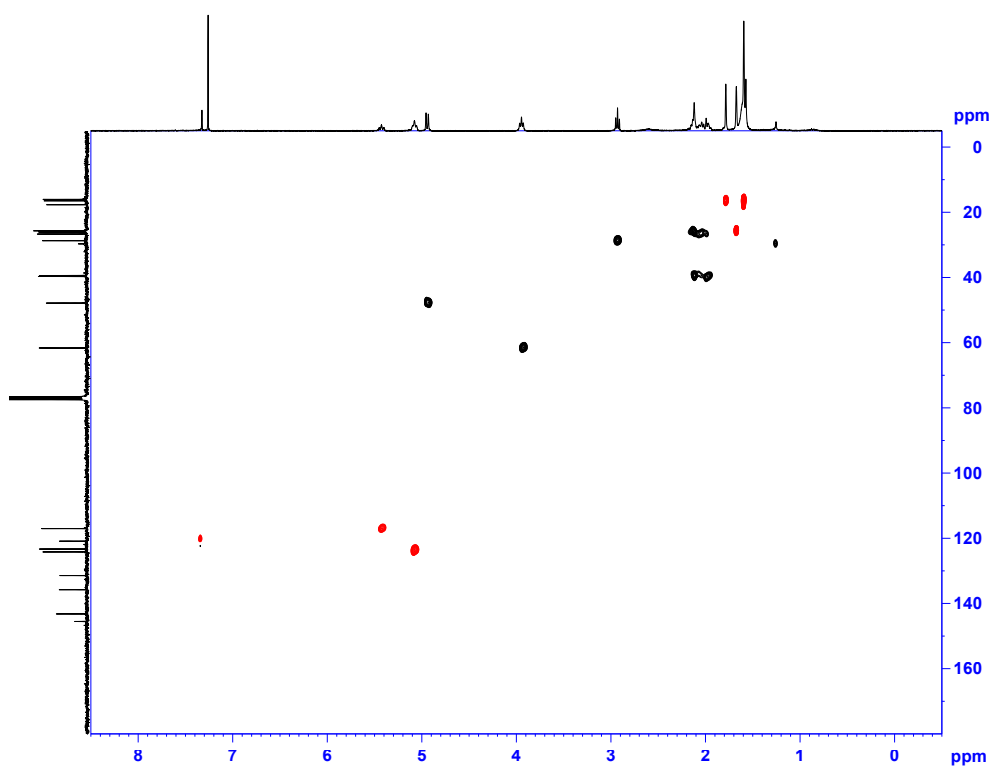



$^{13}\text{C}$  NMR (75 MHz,  $\text{CDCl}_3$ )

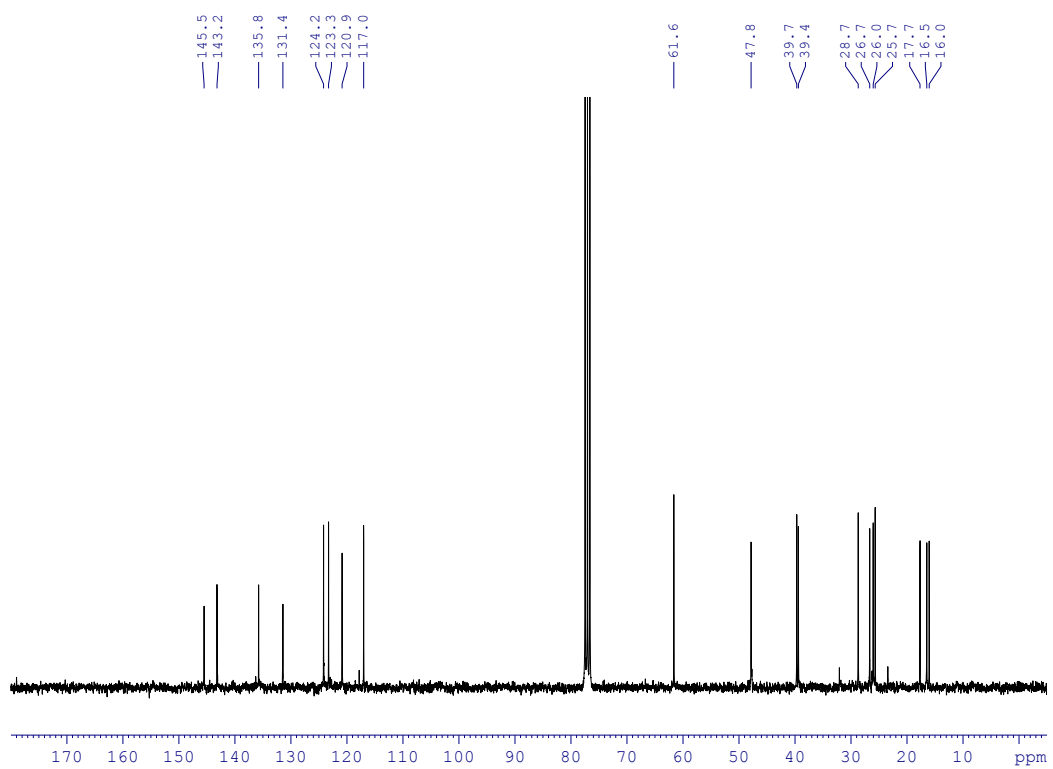

HSQC (CDCl<sub>3</sub>)

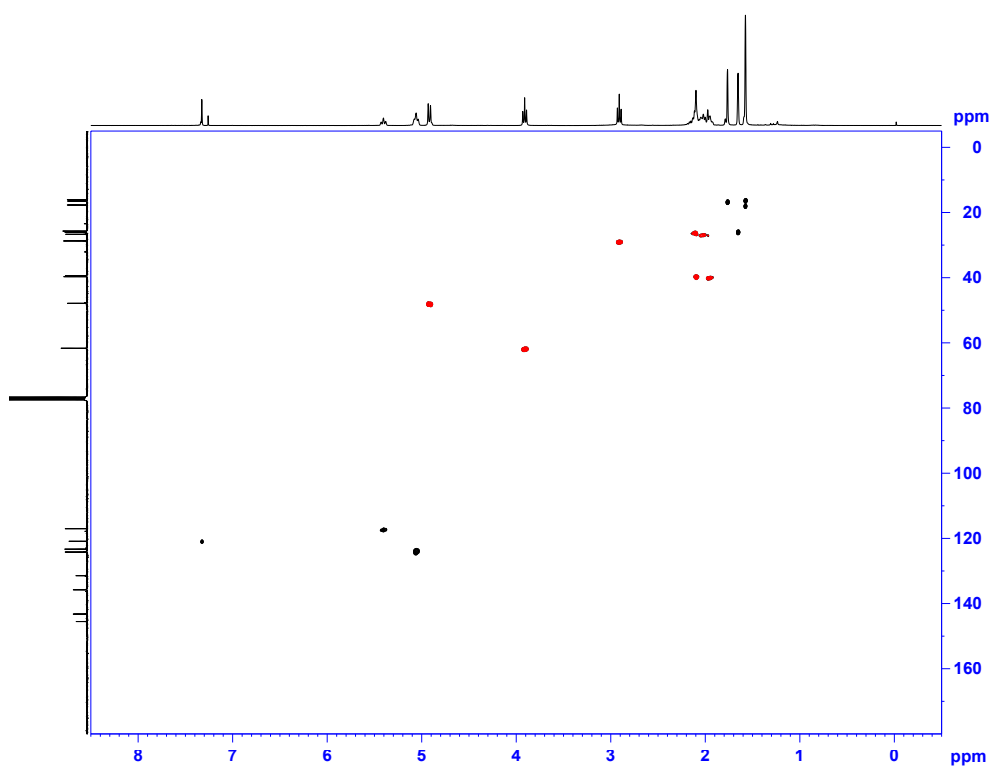

# Compound 4a

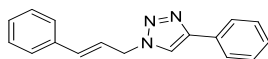

$^1\text{H}$  NMR (300 MHz,  $\text{CDCl}_3$ )

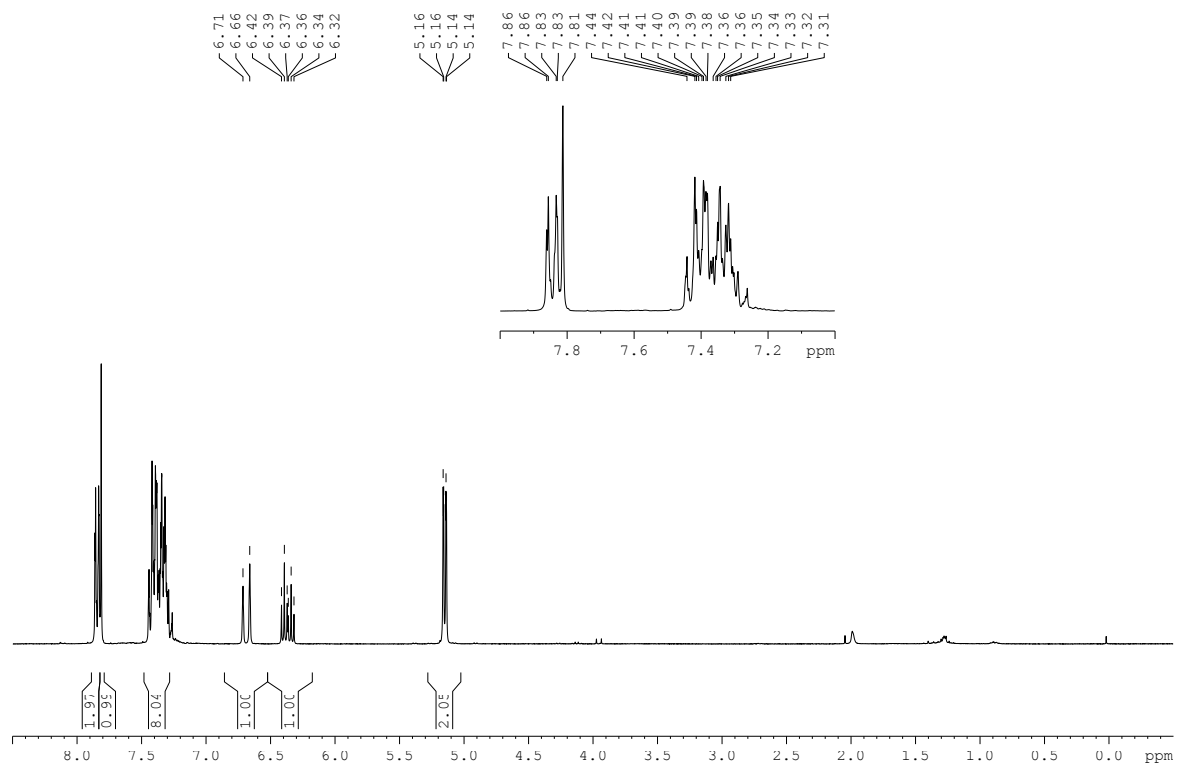

$^{13}\text{C}$  NMR (75 MHz,  $\text{CDCl}_3$ )

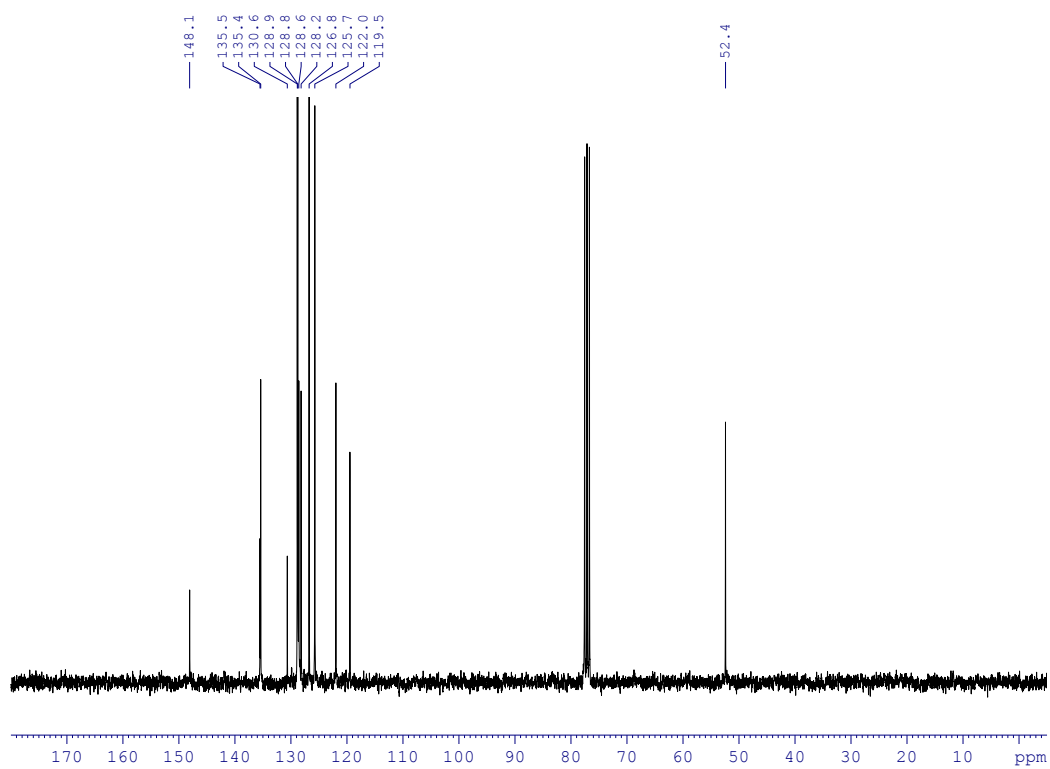

DEPT (CDCl<sub>3</sub>)

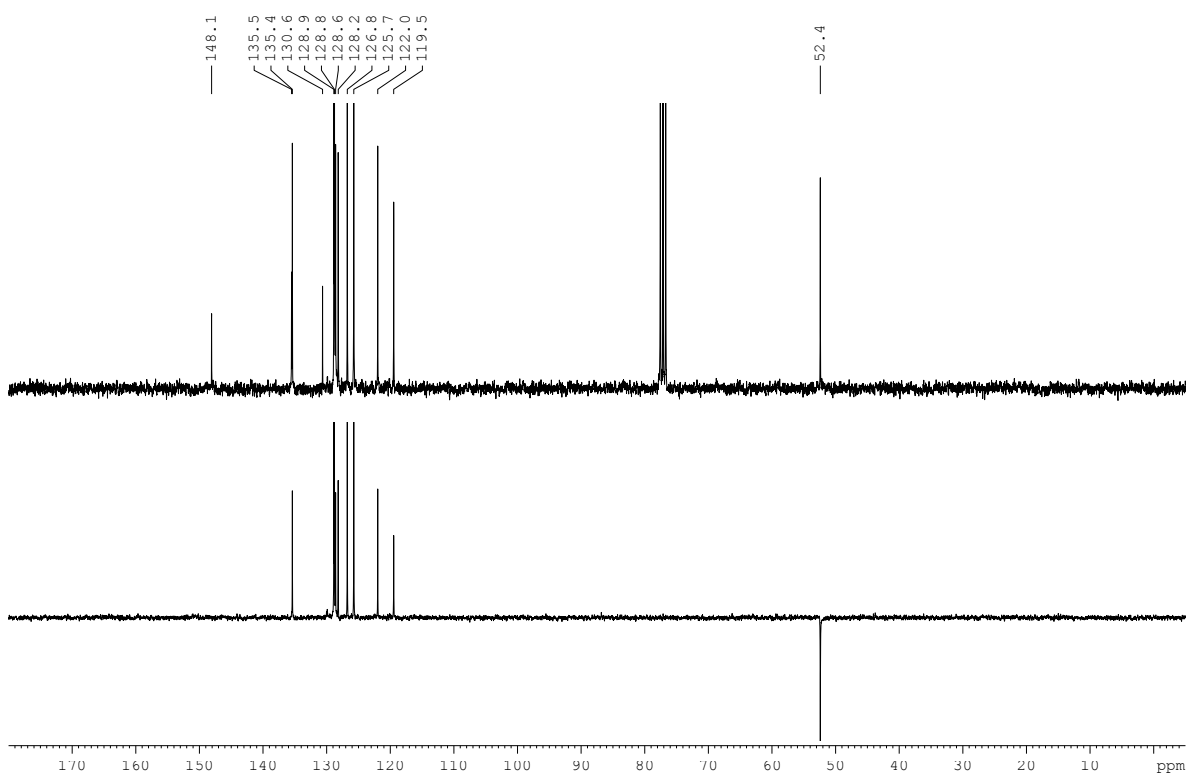



# Compound 4b

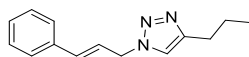

$^1\text{H}$  NMR (300 MHz,  $\text{CDCl}_3$ )

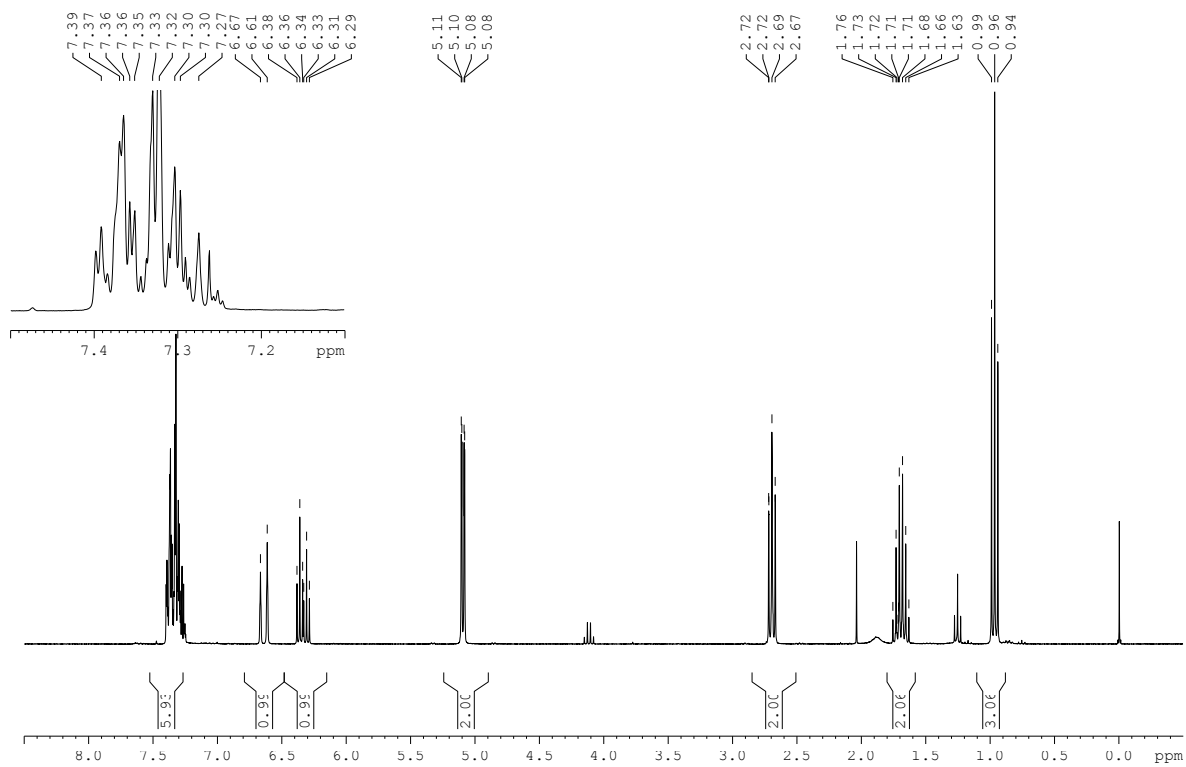

$^{13}\text{C}$  NMR (75 MHz,  $\text{CDCl}_3$ )

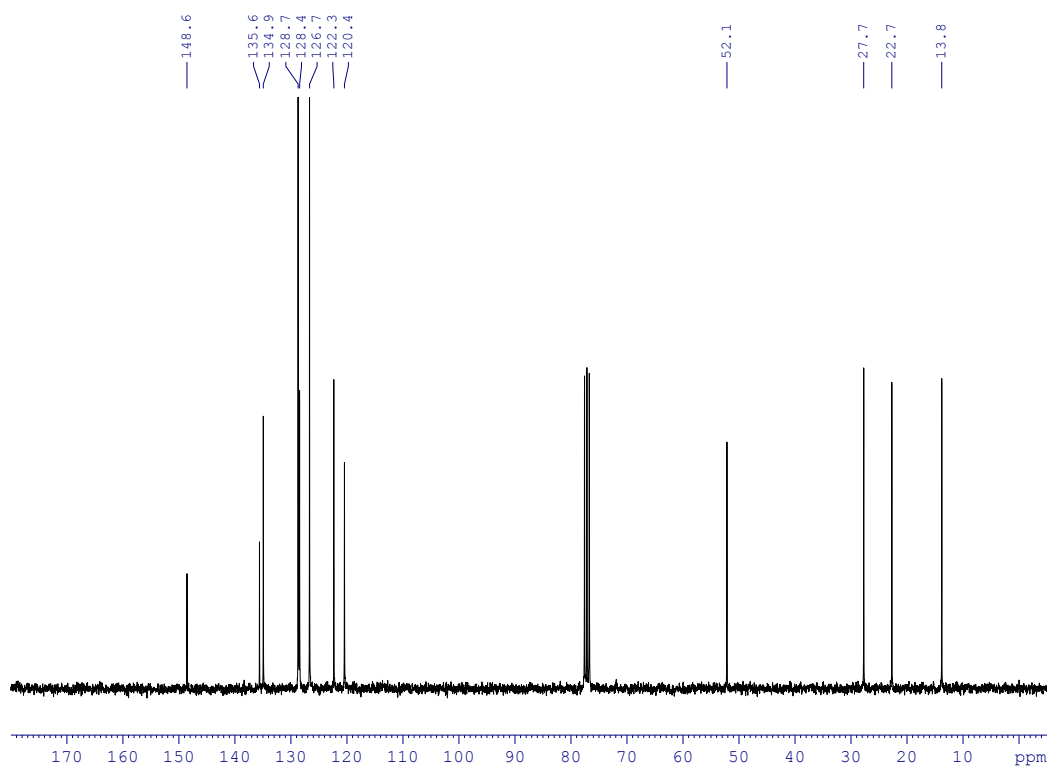

HSQC (CDCl<sub>3</sub>)

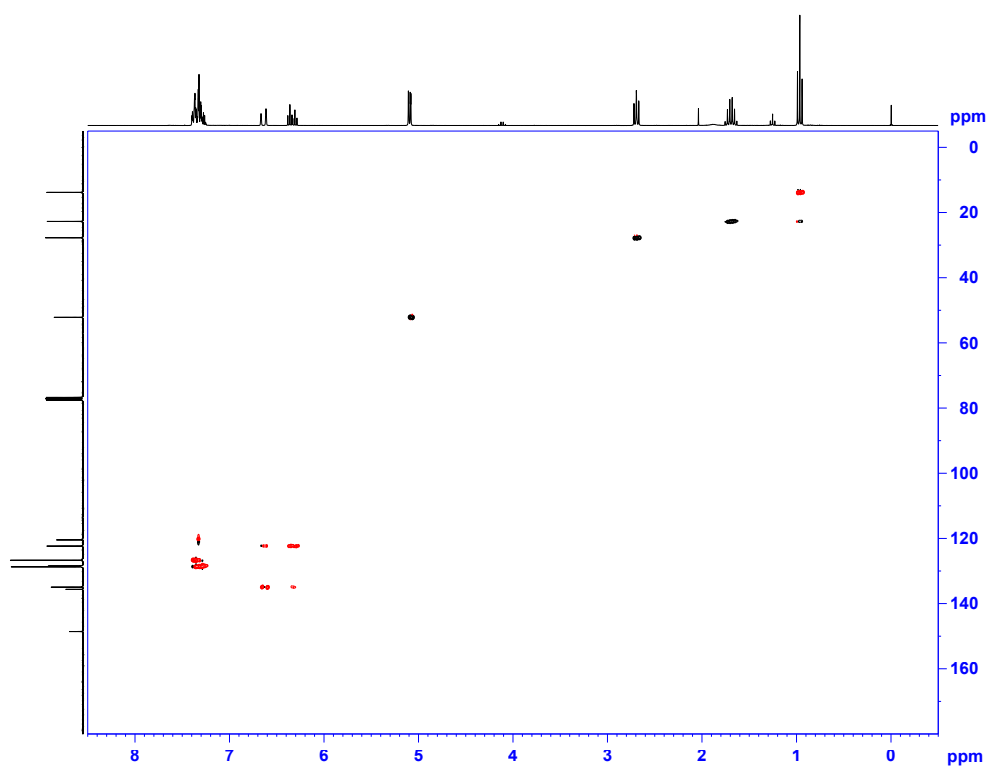

# Compound 4c

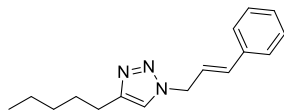

$^1\text{H}$  NMR (300 MHz,  $\text{CDCl}_3$ )

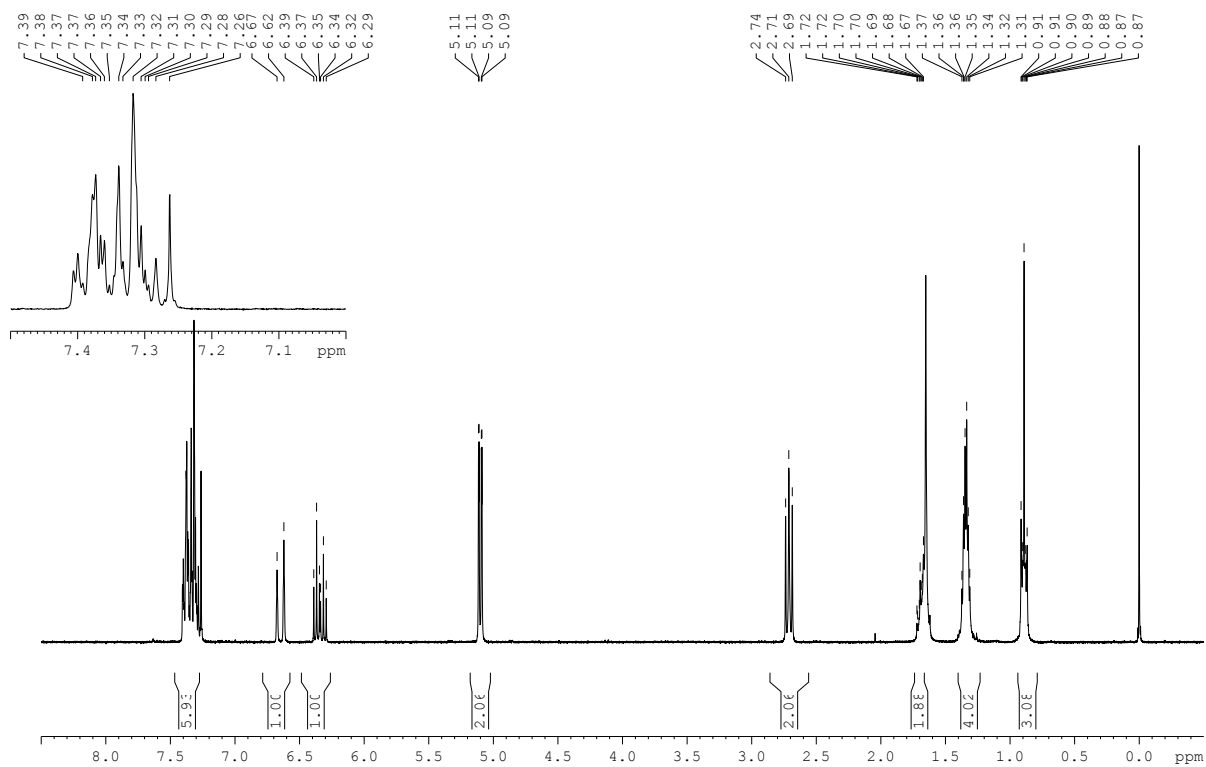

$^{13}\text{C}$  NMR (75 MHz,  $\text{CDCl}_3$ )

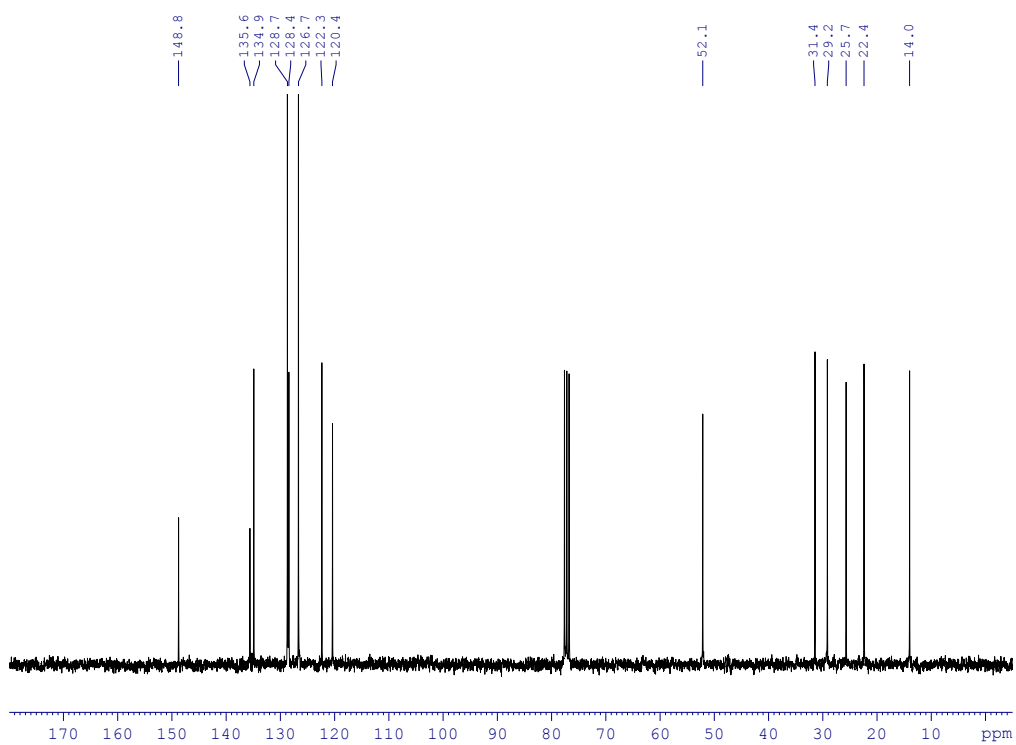

HSQC (CDCl<sub>3</sub>)

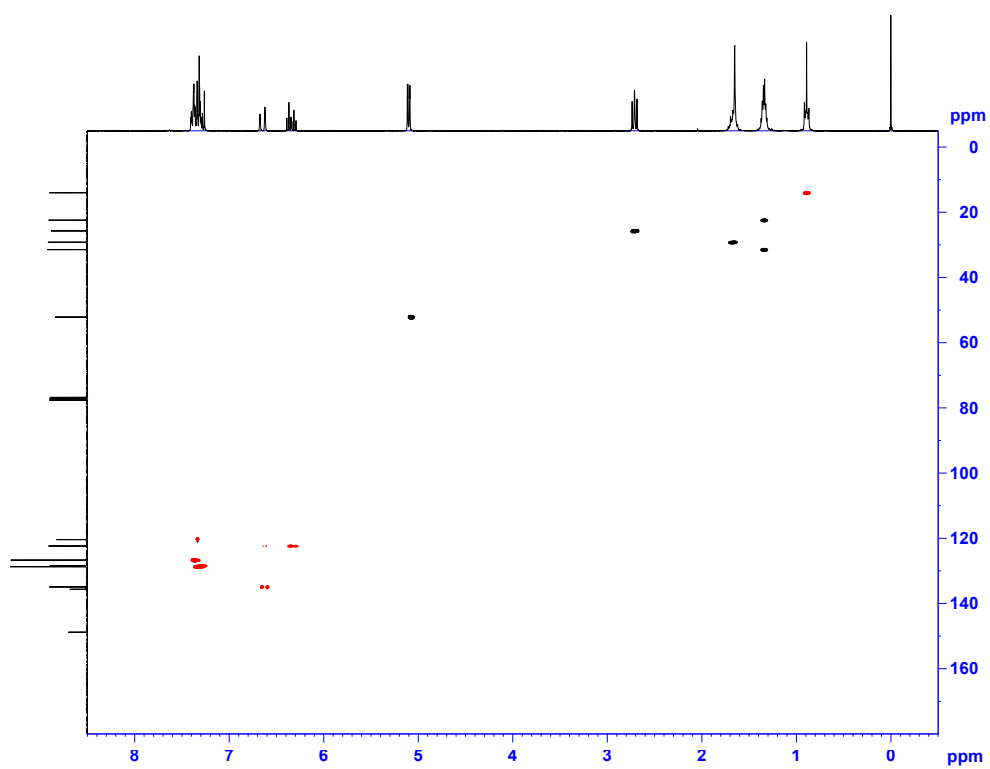

# Compound 4d

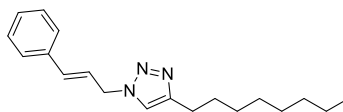

$^1\text{H}$  NMR (300 MHz,  $\text{CDCl}_3$ )

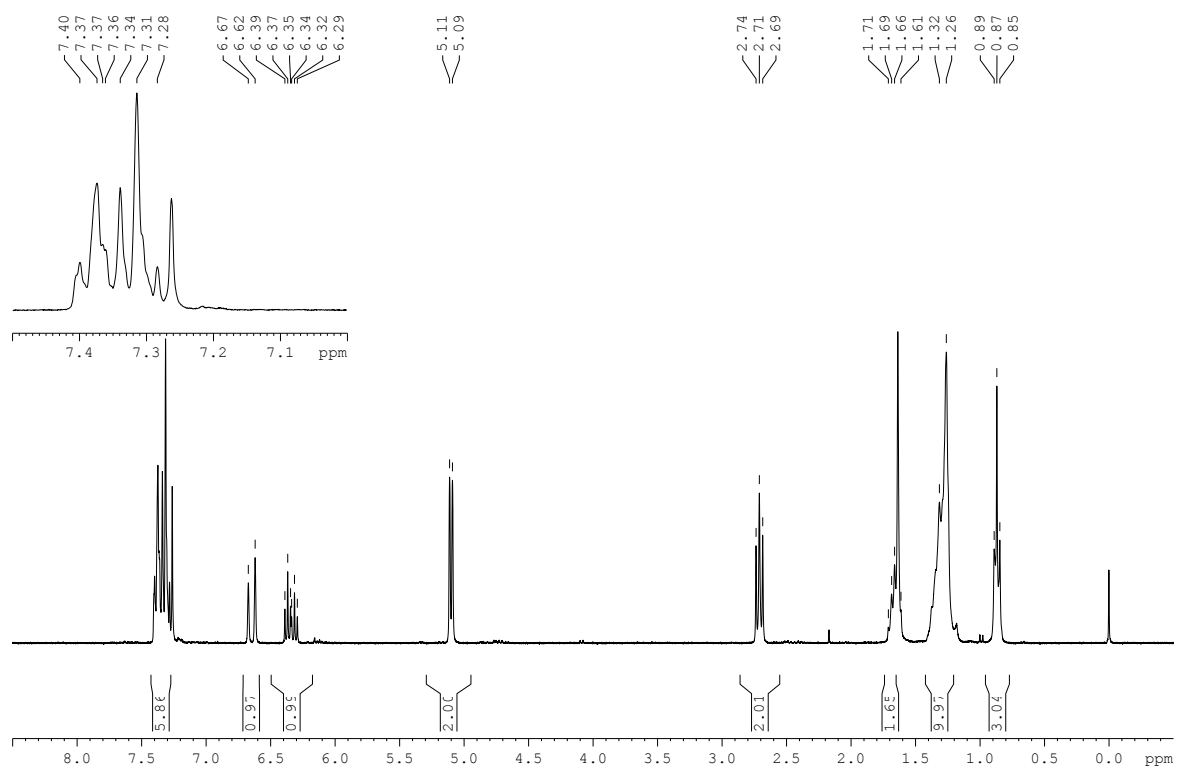

$^{13}\text{C}$  NMR (75 MHz,  $\text{CDCl}_3$ )

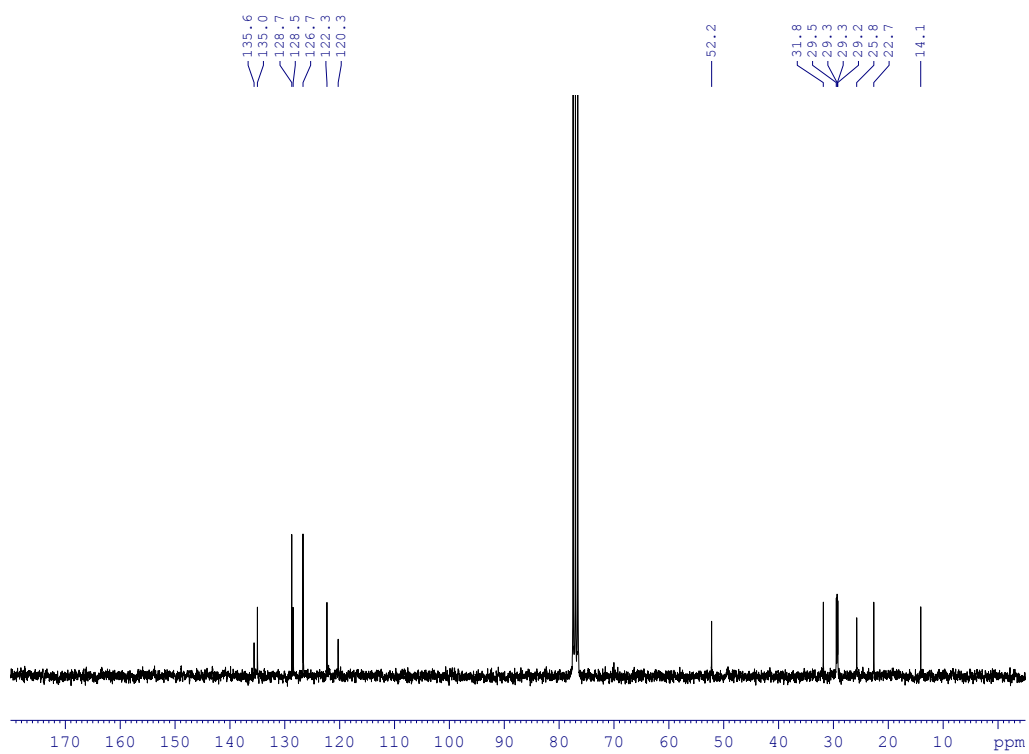



DEPT (CDCl<sub>3</sub>)

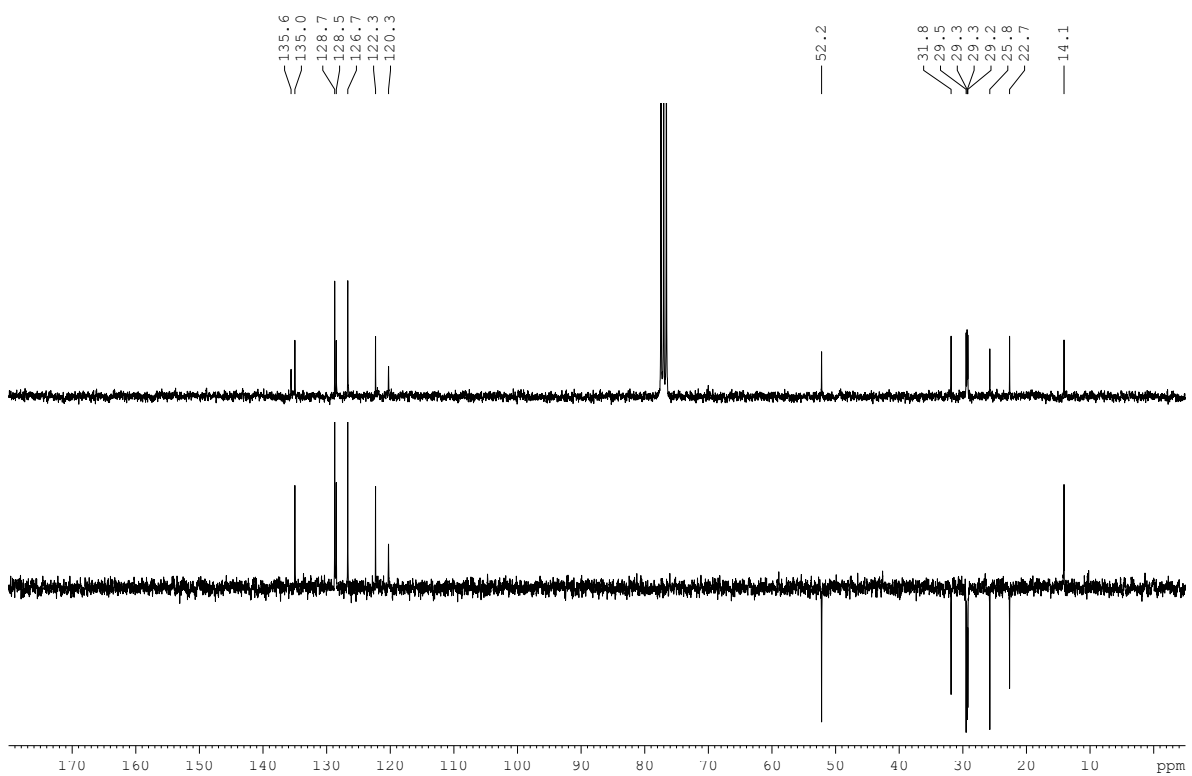

# Compound 4e

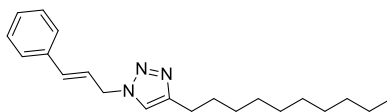

$^1\text{H}$  NMR (300 MHz,  $\text{CDCl}_3$ )

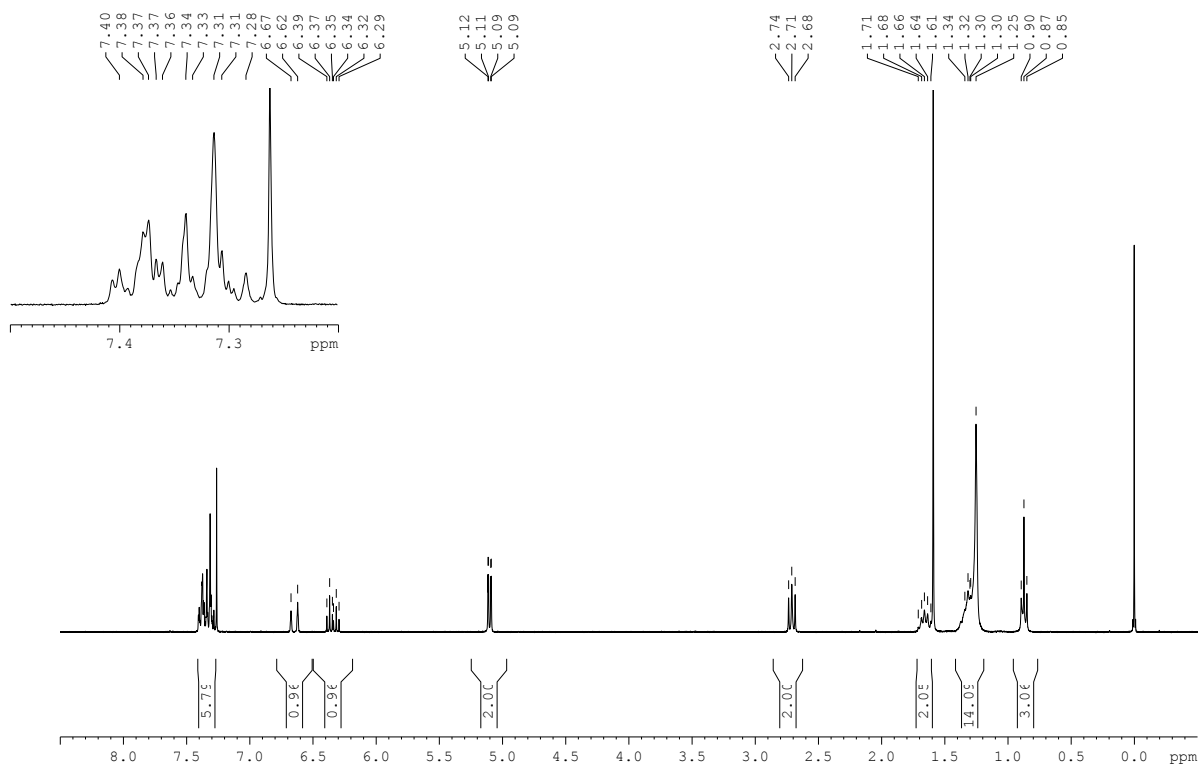

$^{13}\text{C}$  NMR (75 MHz,  $\text{CDCl}_3$ )

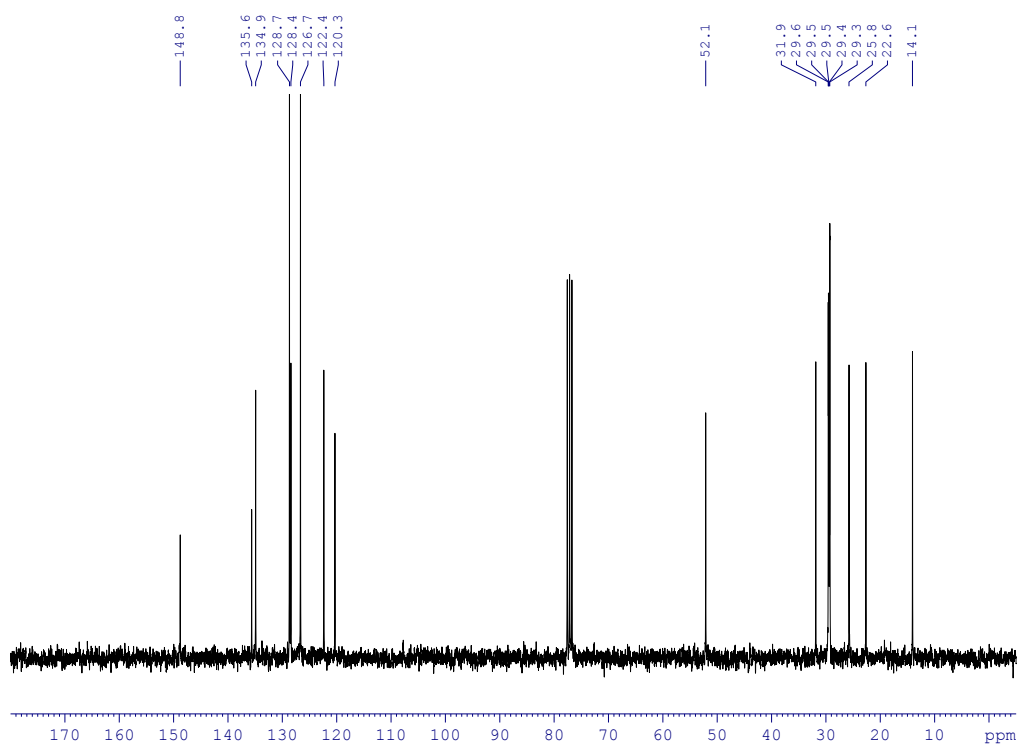

HSQC (CDCl<sub>3</sub>)

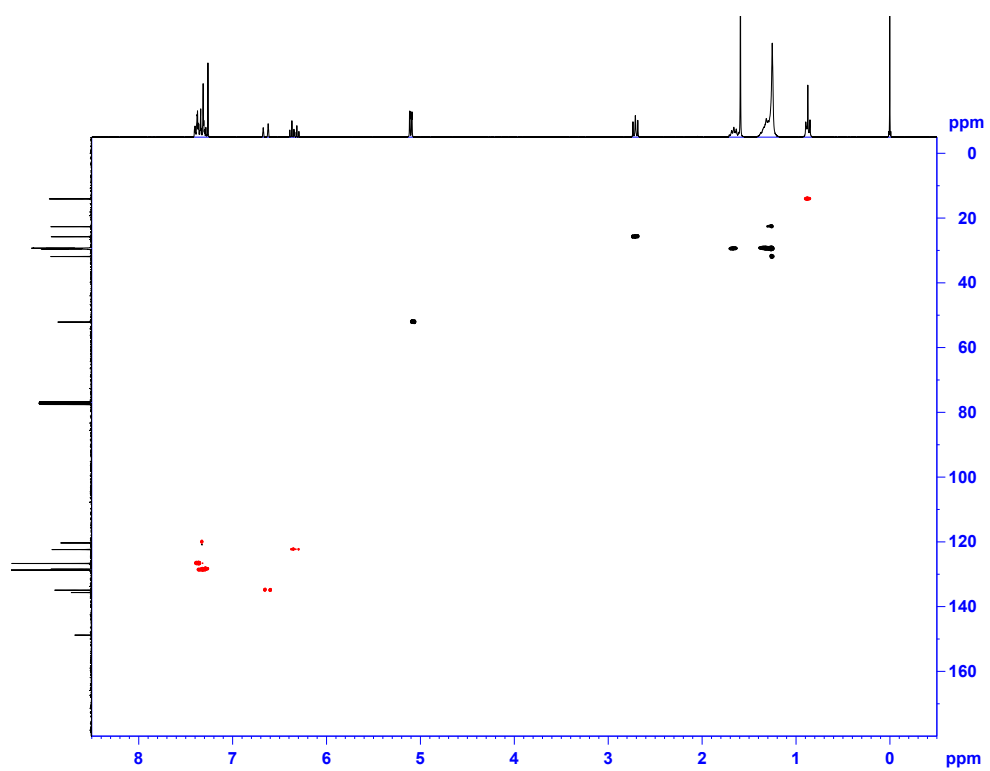

# Compound 5h

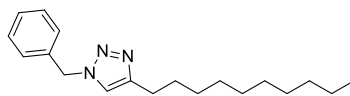

$^1\text{H}$  NMR (300 MHz,  $\text{CDCl}_3$ )

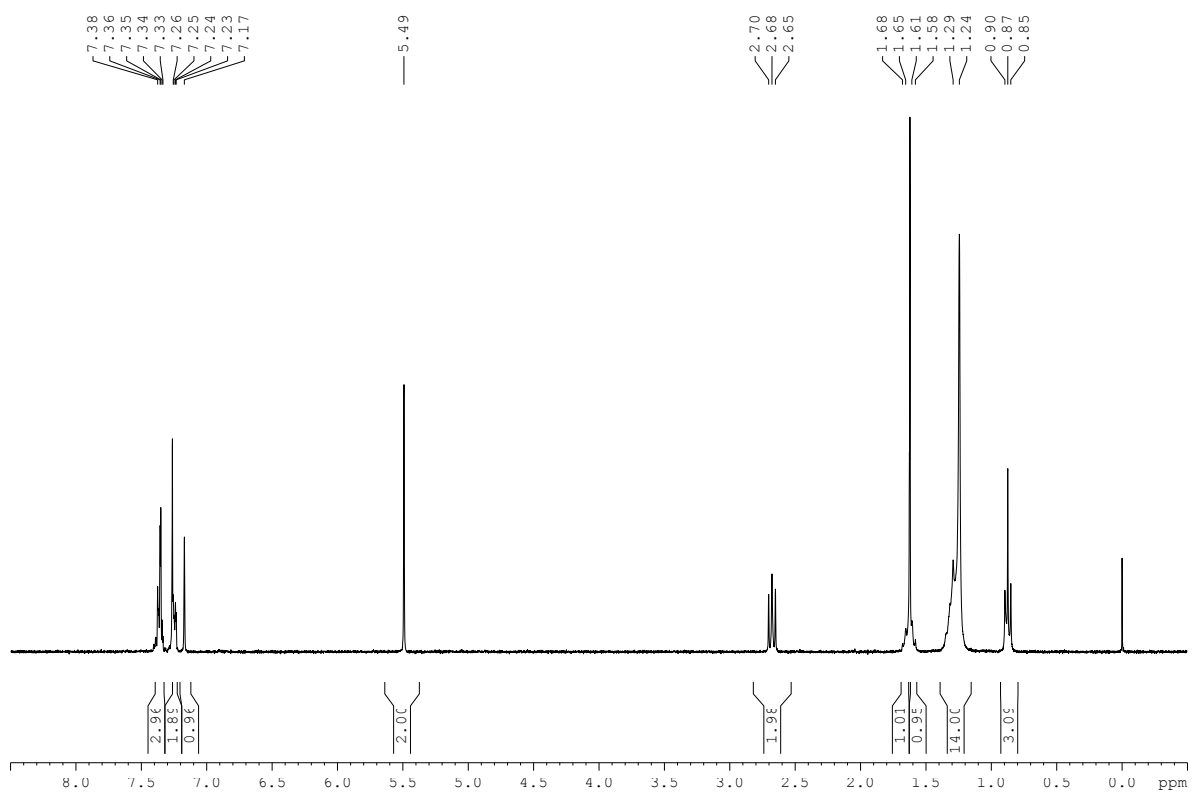

$^{13}\text{C}$  NMR (75 MHz,  $\text{CDCl}_3$ )

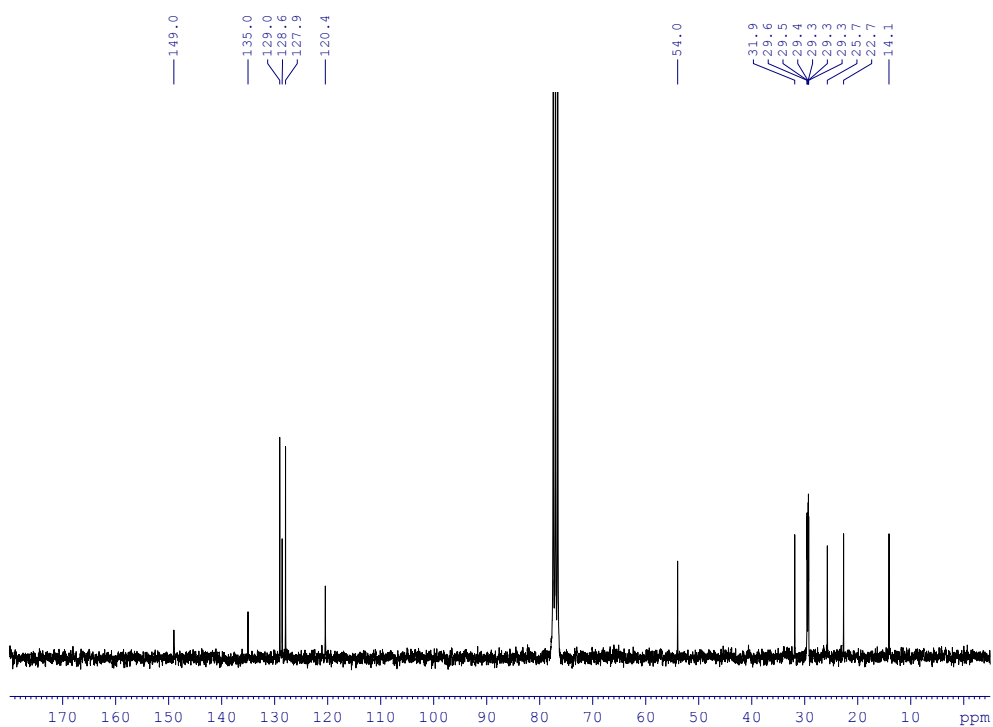

DEPT (CDCl<sub>3</sub>)

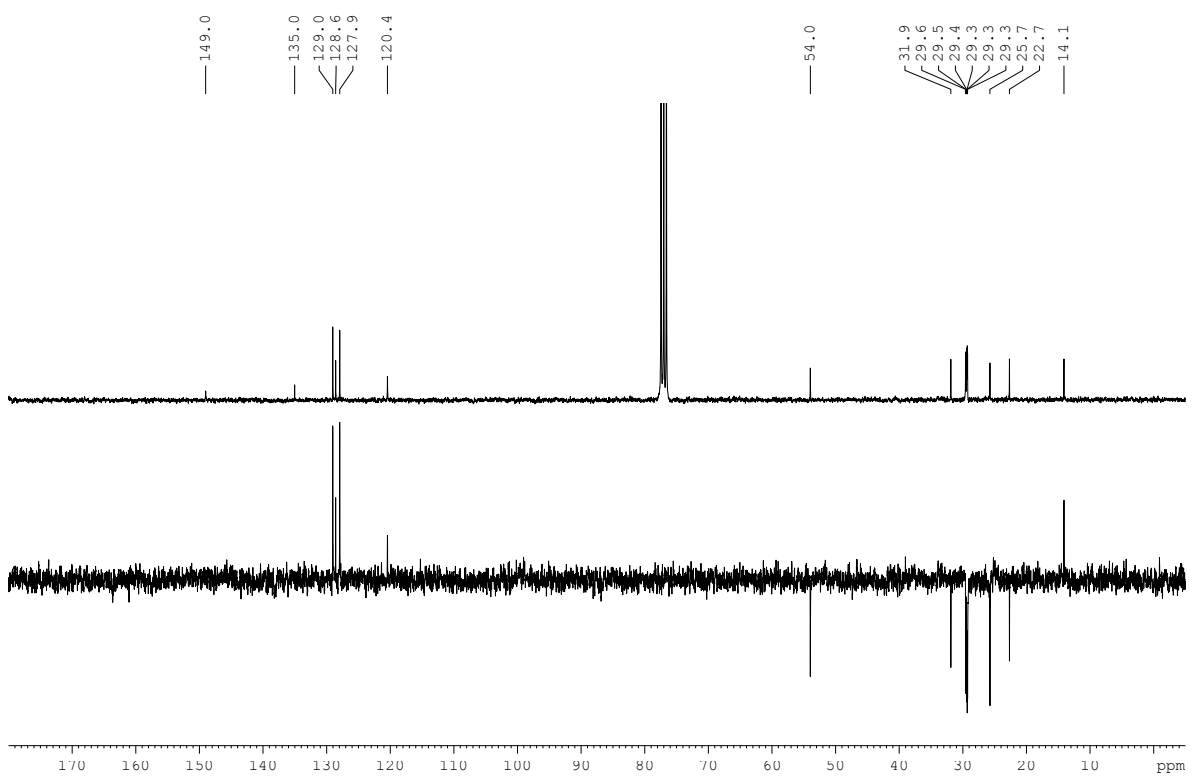

# Compound 6a

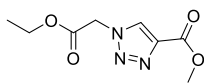

$^1\text{H}$  NMR (300 MHz,  $\text{CDCl}_3$ )

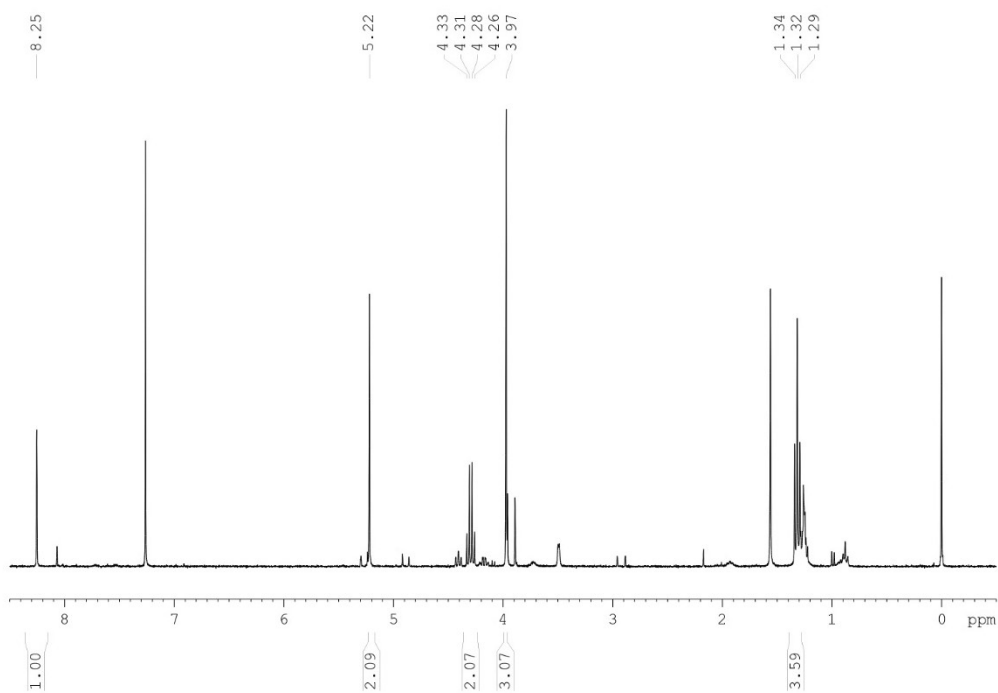



$^{13}\text{C}$  NMR (75 MHz,  $\text{CDCl}_3$ )

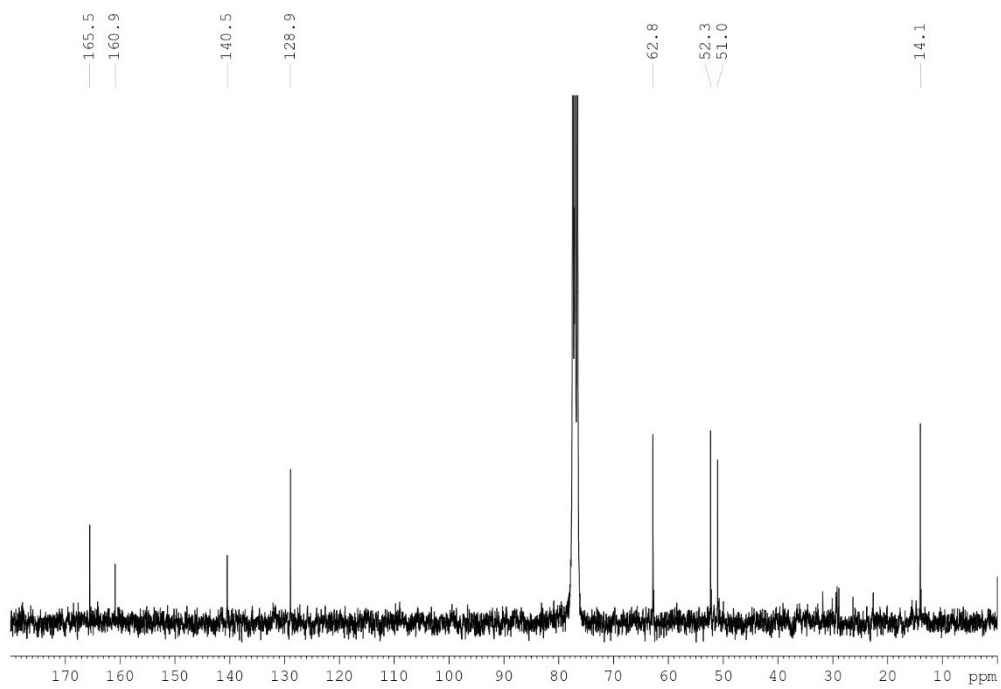

HSQC (CDCl<sub>3</sub>)

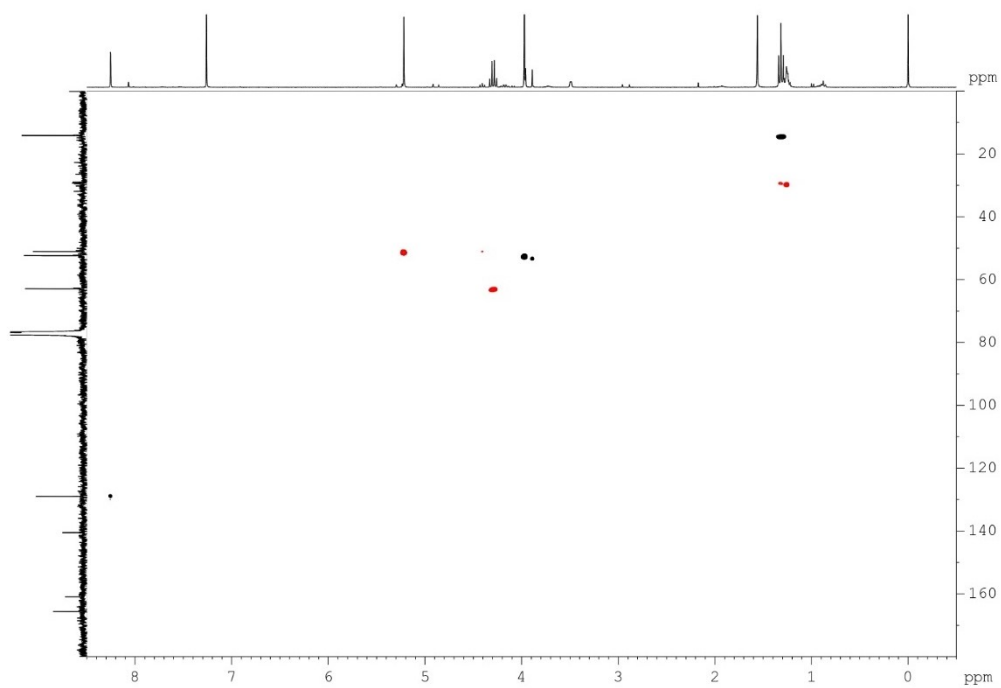

# Compound 7c

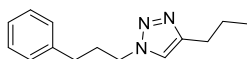

$^1\text{H}$  NMR (300 MHz,  $\text{CDCl}_3$ )

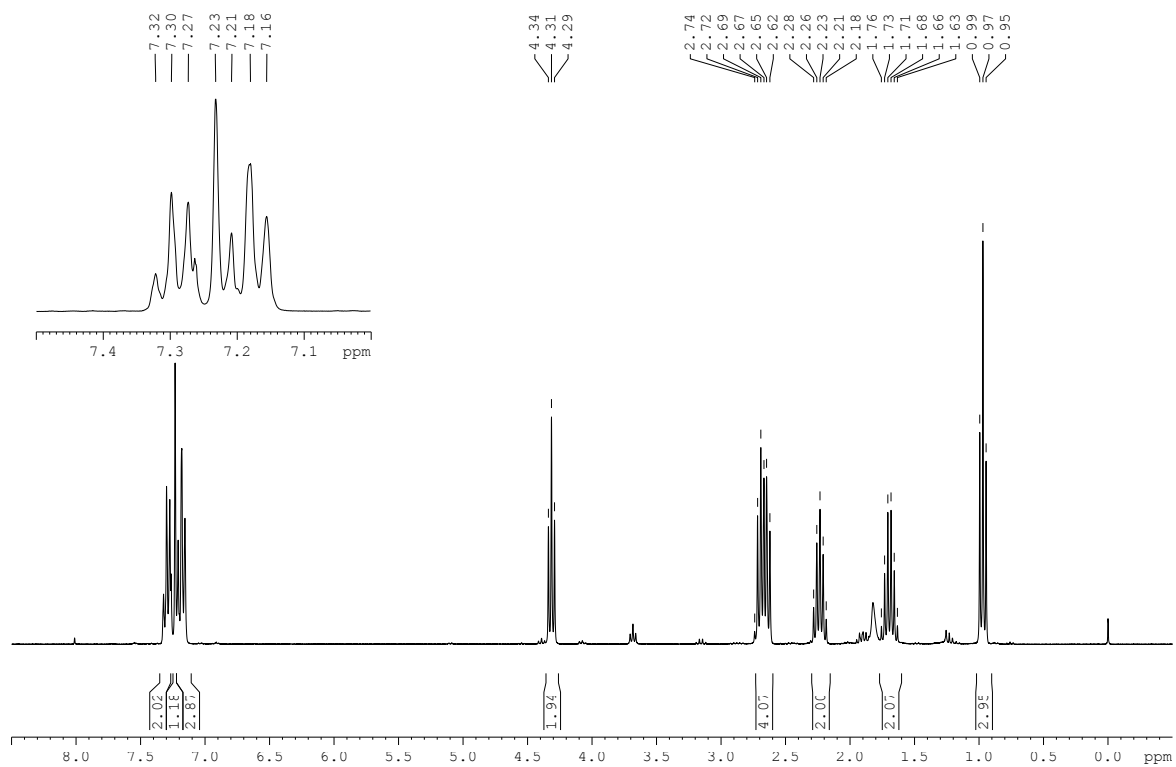

$^{13}\text{C}$  NMR (75 MHz,  $\text{CDCl}_3$ )

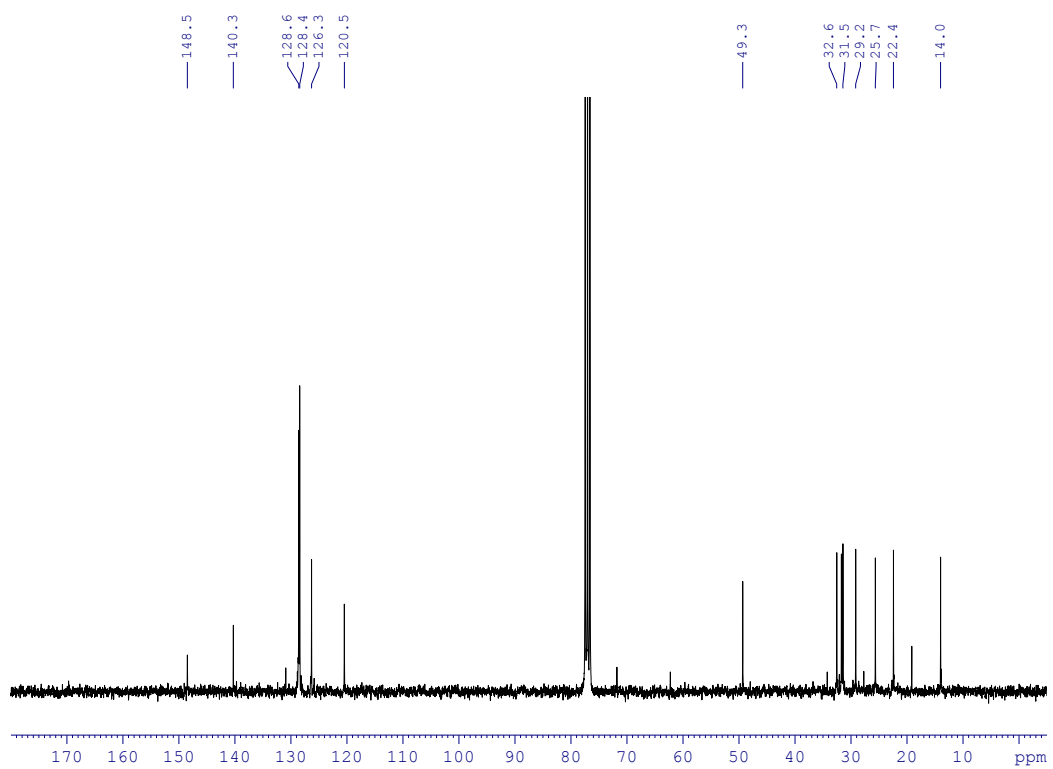

DEPT (CDCl<sub>3</sub>)

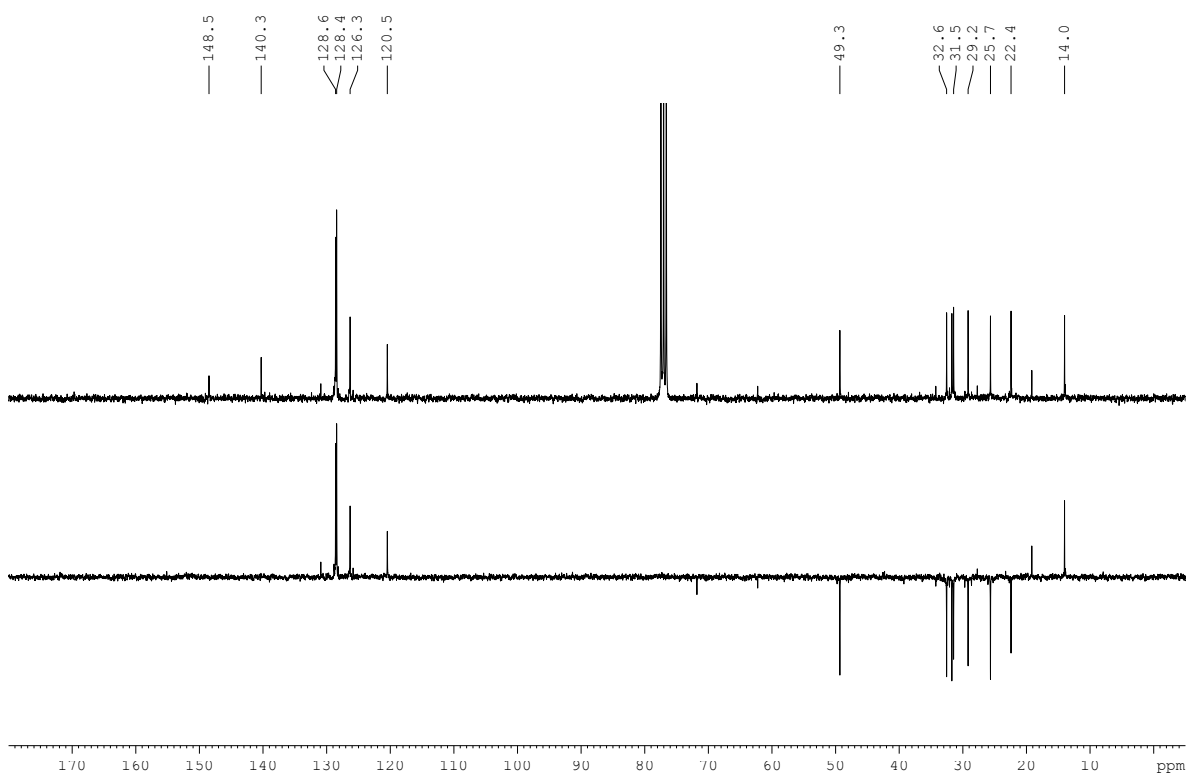

# Compound 7d

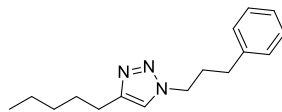

$^1\text{H}$  NMR (300 MHz,  $\text{CDCl}_3$ )

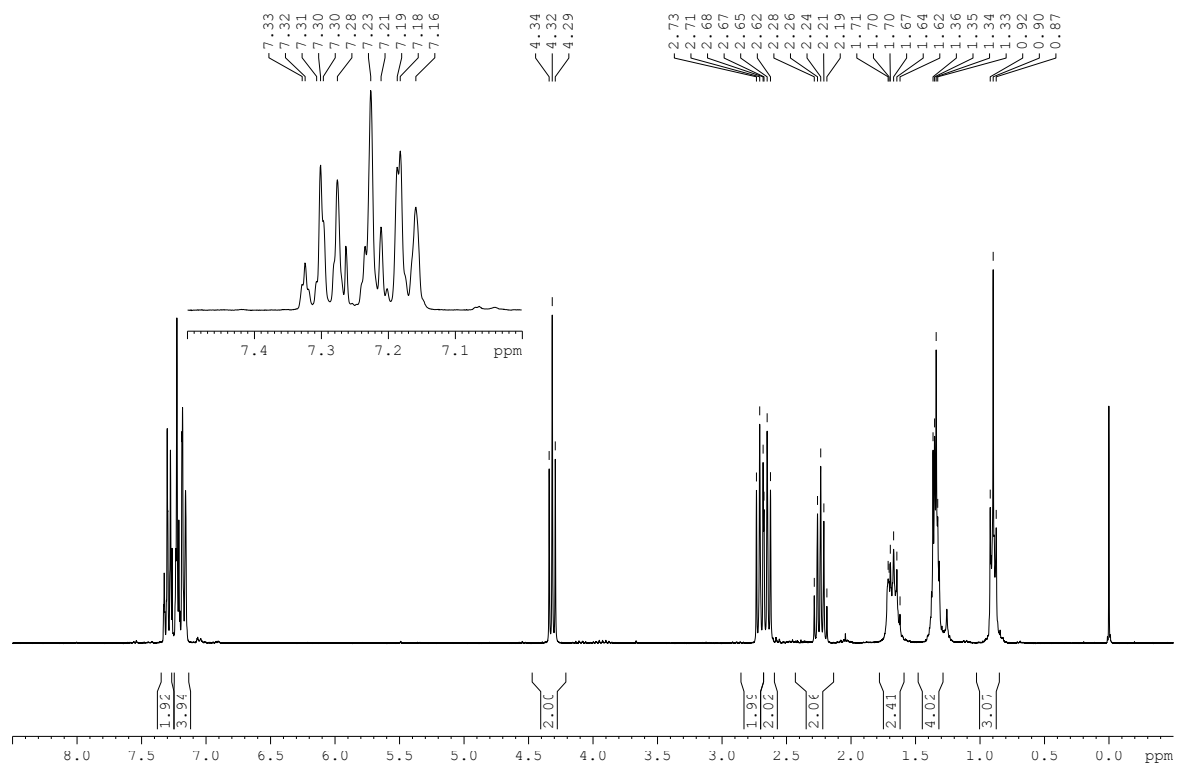

$^{13}\text{C}$  NMR (75 MHz,  $\text{CDCl}_3$ )

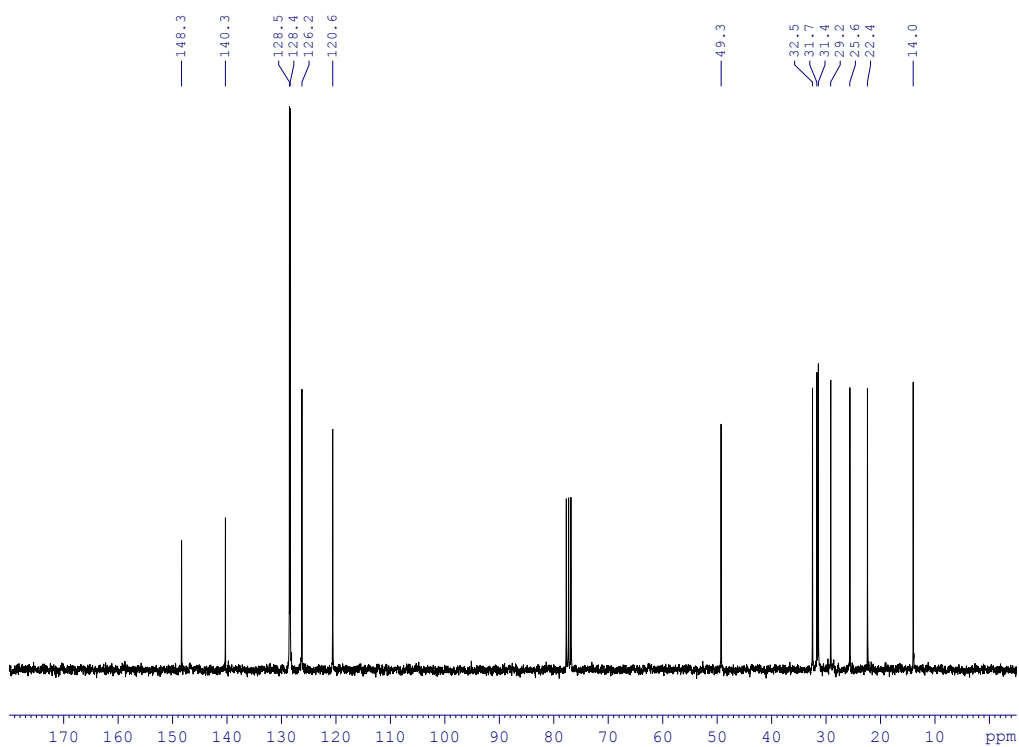

DEPT (CDCl<sub>3</sub>)

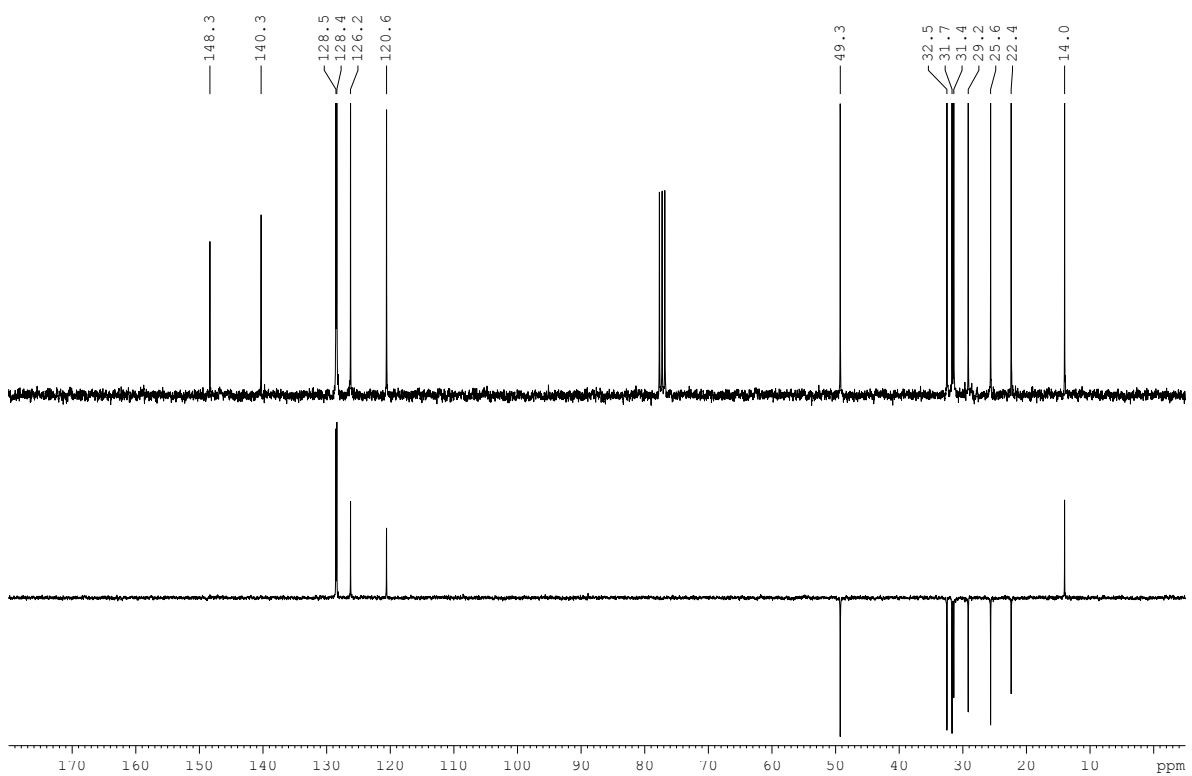



# Compound 7e

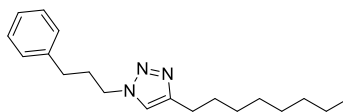

$^1\text{H}$  NMR (300 MHz,  $\text{CDCl}_3$ )

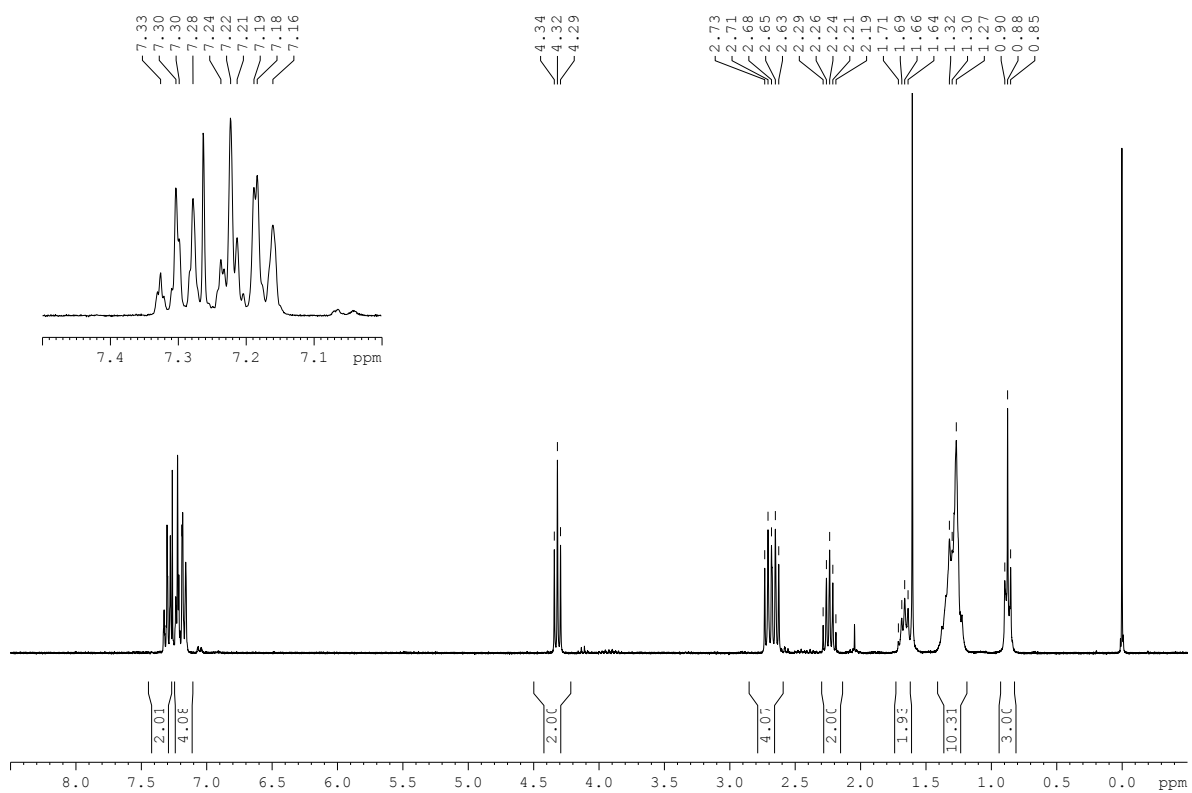

$^{13}\text{C}$  NMR (75 MHz,  $\text{CDCl}_3$ )

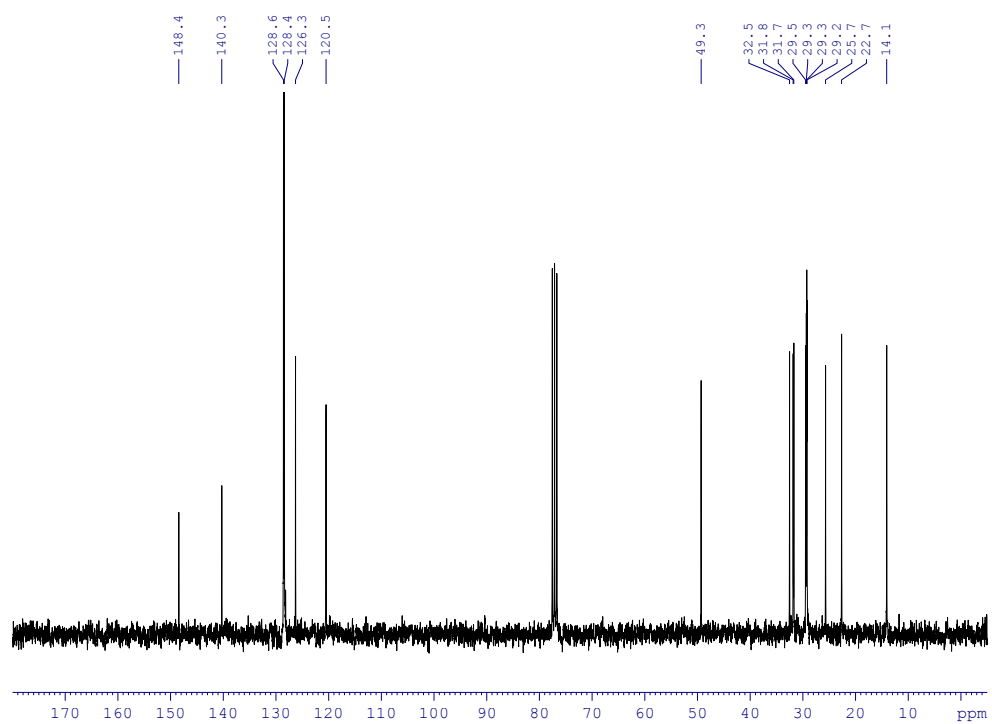

DEPT (CDCl<sub>3</sub>)

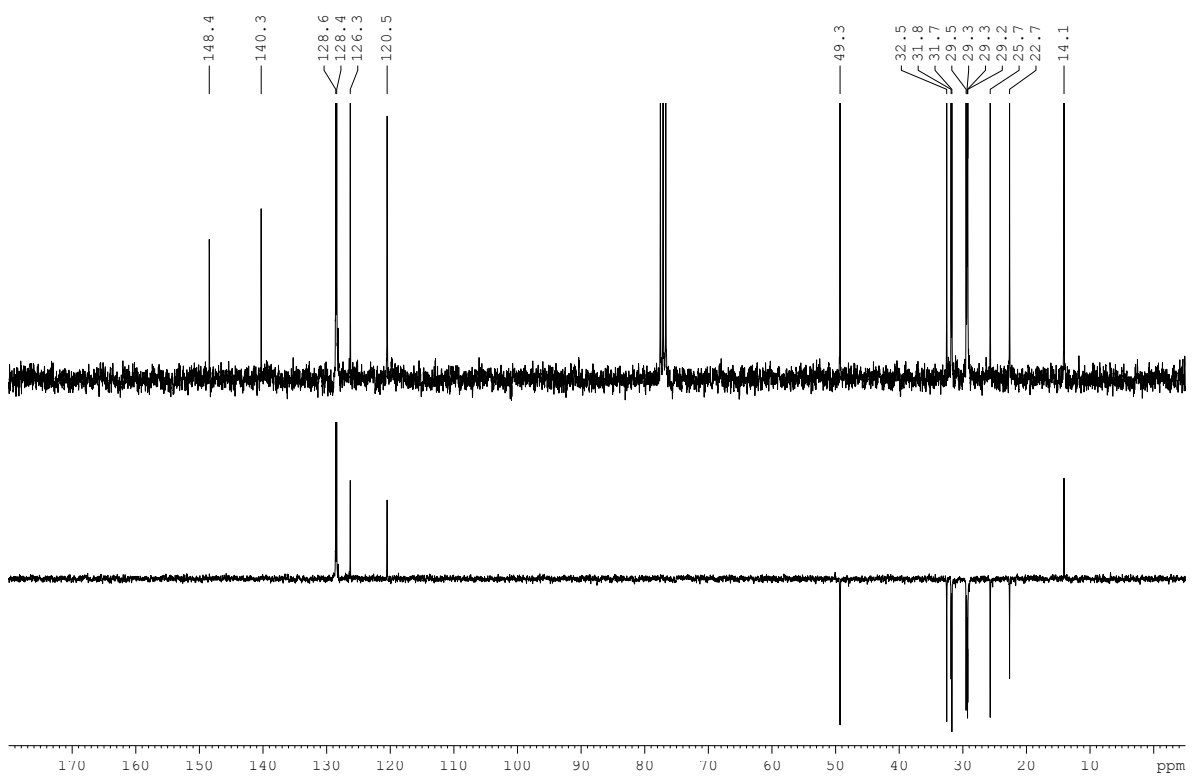

# Compound 7g

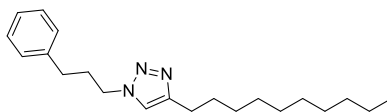

$^1\text{H}$  NMR (300 MHz,  $\text{CDCl}_3$ )

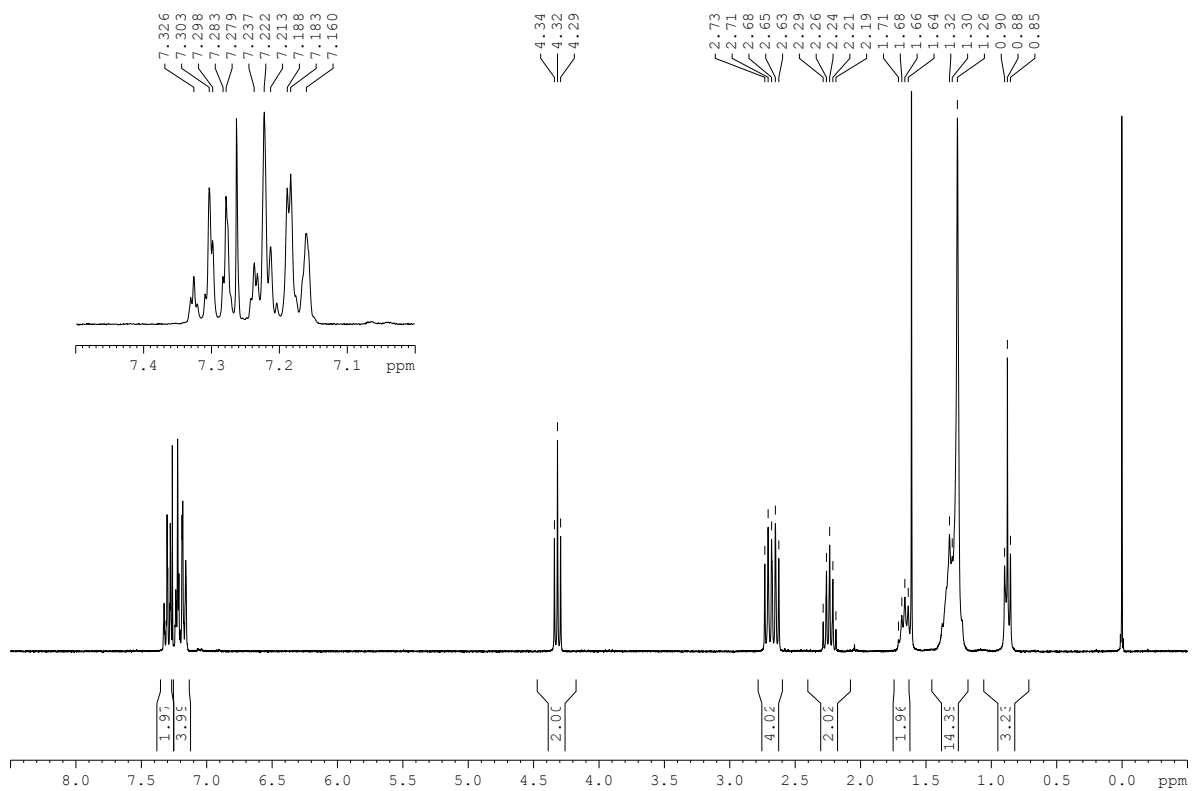

$^{13}\text{C}$  NMR (75 MHz,  $\text{CDCl}_3$ )

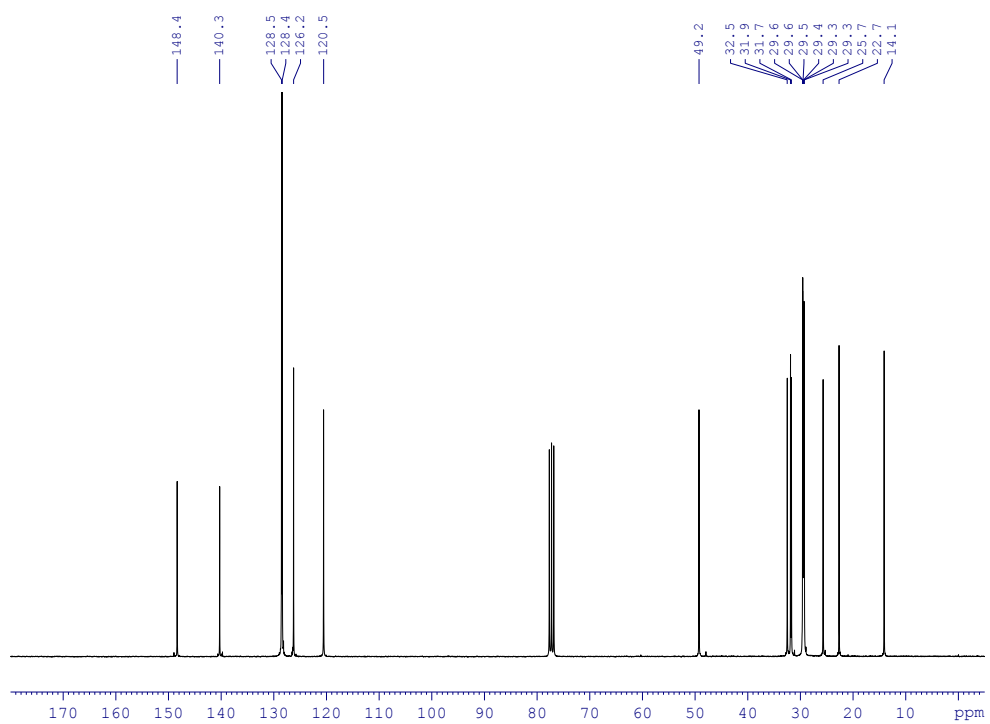

HSQC (CDCl<sub>3</sub>)

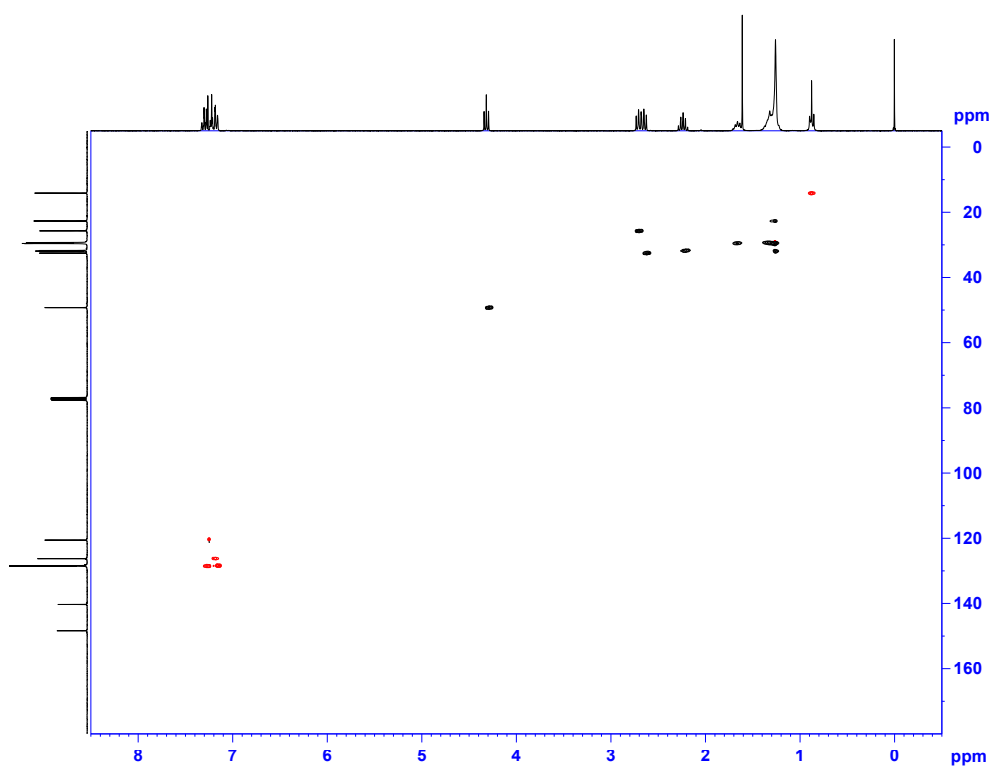

# Compound 7h

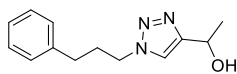

$^1\text{H}$  NMR (300 MHz,  $\text{CDCl}_3$ )

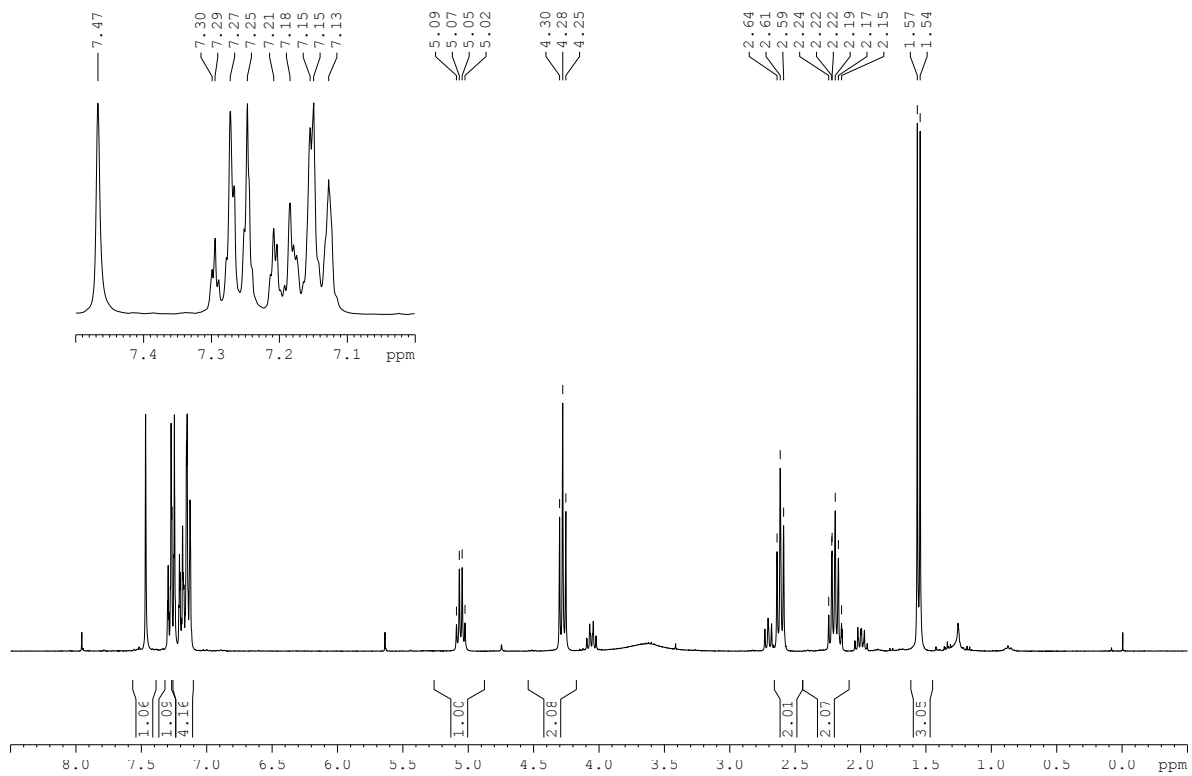

$^{13}\text{C}$  NMR (75 MHz,  $\text{CDCl}_3$ )

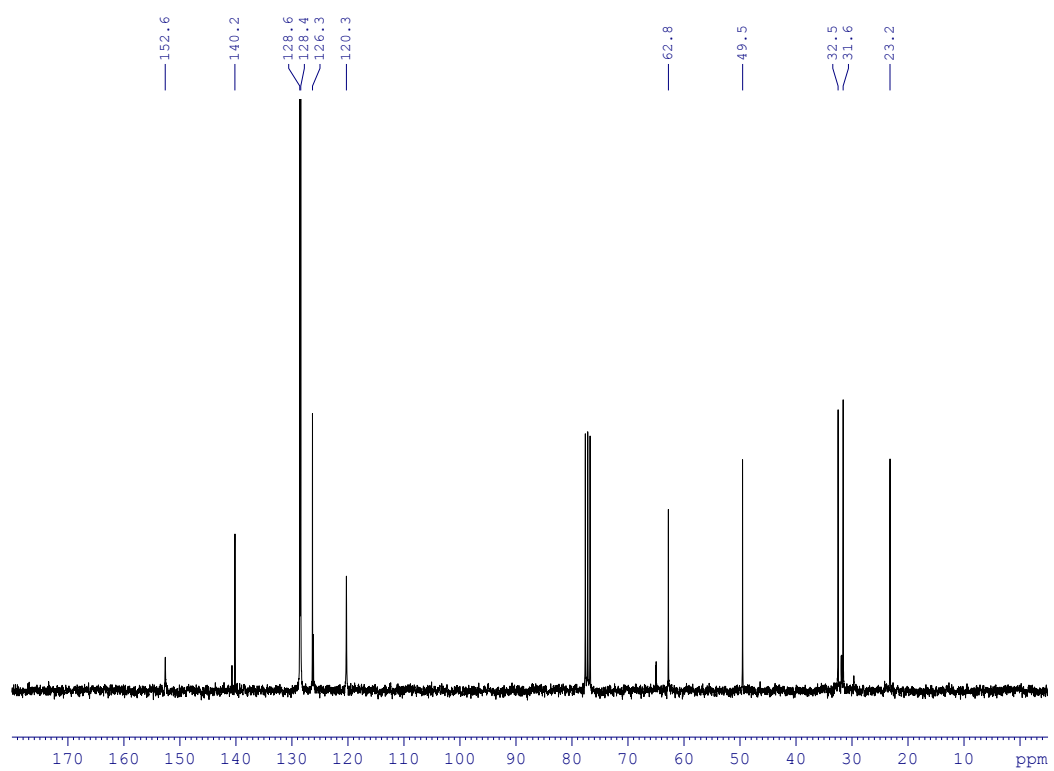



DEPT (CDCl<sub>3</sub>)

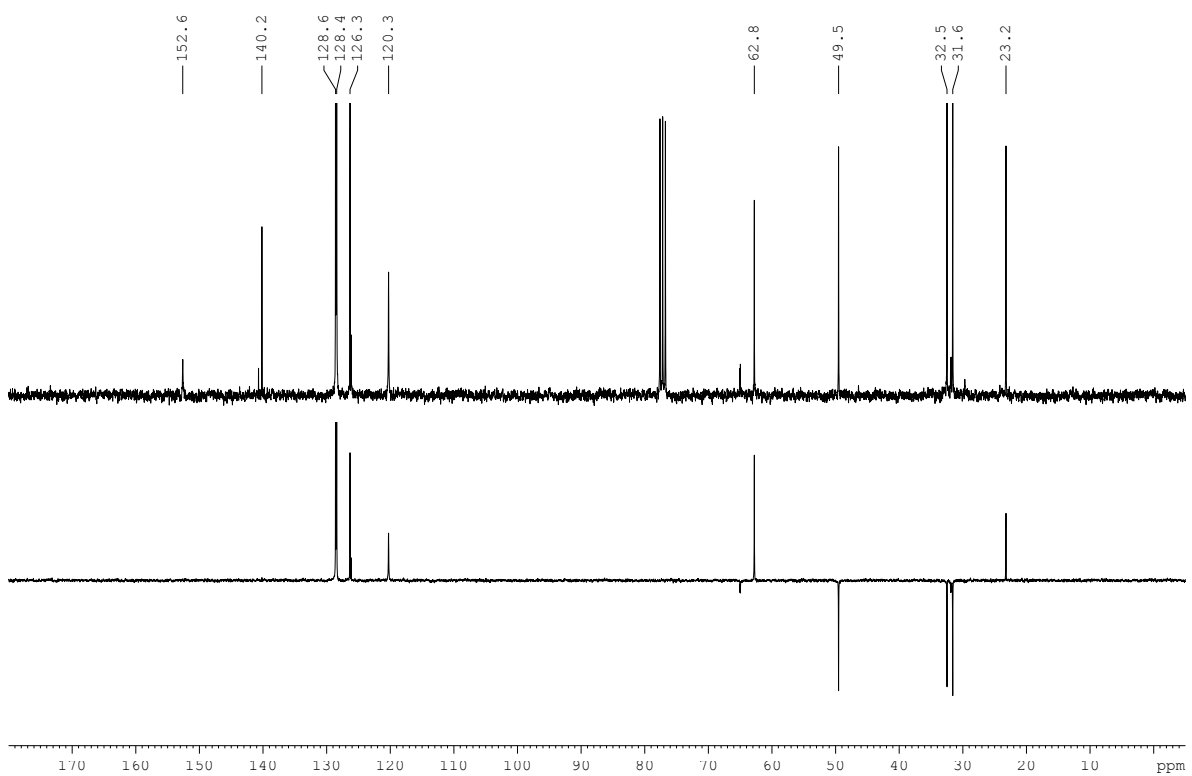

Physicochemical properties calculated in DATAWARRIOR

| ID | SMILE                                                             | MW     | cLogP | cLogS | HA | HD | TSA    | Relative PSA | PSA   | Mutagenic | Tumorigenic | Irritant |
|----|-------------------------------------------------------------------|--------|-------|-------|----|----|--------|--------------|-------|-----------|-------------|----------|
| 1a | <chem>C/C(CC\C=C(C)/C)=C\CC/C(C)=C/CN1N=NC(CO)=C1</chem>          | 303.45 | 4.69  | -2.67 | 4  | 1  | 272.06 | 0.15         | 50.94 | none      | none        | none     |
| 1b | <chem>C/C(C)=C\CC/C(C)=C/CC/C(C)=C\Cn1nnc(CO)c1</chem>            | 303.45 | 4.69  | -2.67 | 4  | 1  | 272.06 | 0.15         | 50.94 | none      | none        | none     |
| 1c | <chem>C/C(CC\C=C(C)/C)=C\CC/C(C)=C/CN1N=NC(C(C)O)=C1</chem>       | 317.48 | 4.97  | -2.74 | 4  | 1  | 283.06 | 0.15         | 50.94 | none      | none        | none     |
| 1d | <chem>CC(c1nnn(C/C=C(CC/C=C(CC/C=C(C)\C)\C)/C)c1)O</chem>         | 317.48 | 4.97  | -2.74 | 4  | 1  | 283.06 | 0.15         | 50.94 | none      | none        | none     |
| 1e | <chem>C/C(CC\C=C(C)/C)=C\CC/C(C)=C/CN1N=NC(C(C)(C)O)=C1</chem>    | 331.50 | 5.56  | -3.16 | 4  | 1  | 293.23 | 0.14         | 50.94 | none      | none        | none     |
| 1f | <chem>C/C(C)=C\CC/C(C)=C/CC/C(C)=C\Cn1nnc(C(C)O)c1</chem>         | 331.50 | 5.56  | -3.16 | 4  | 1  | 293.23 | 0.14         | 50.94 | none      | none        | none     |
| 1g | <chem>C/C(CC\C=C(C)/C)=C\CC/C(C)=C/CN1N=NC(CCO)=C1</chem>         | 317.48 | 5.12  | -2.79 | 4  | 1  | 285.82 | 0.15         | 50.94 | none      | none        | none     |
| 1h | <chem>C/C(C)=C\CC/C(C)=C/CC/C(C)=C\Cn1nnc(CCO)c1</chem>           | 317.48 | 5.12  | -2.79 | 4  | 1  | 285.82 | 0.15         | 50.94 | none      | none        | none     |
| 1i | <chem>C/C(CC\C=C(C)/C)=C\CC/C(C)=C\CN1N=NC(CCCCCC)=C1</chem>      | 385.64 | 8.77  | -4.91 | 3  | 0  | 360.53 | 0.08         | 30.71 | none      | none        | none     |
| 1j | <chem>C/C(CC\C=C(C)/C)=C\CC/C(C)=C/CN1N=NC(CCCCCC)=C1</chem>      | 385.64 | 8.77  | -4.91 | 3  | 0  | 360.53 | 0.08         | 30.71 | none      | none        | none     |
| 1k | <chem>C/C(CC\C=C(C)/C)=C\CC/C(C)=C\CN1N=NC(CCCCC)=C1</chem>       | 343.56 | 7.41  | -4.10 | 3  | 0  | 319.25 | 0.09         | 30.71 | none      | none        | none     |
| 1l | <chem>C/C(CC\C=C(C)/C)=C\CC/C(C)=C\CN1N=NC(CCC)=C1</chem>         | 315.50 | 6.50  | -3.56 | 3  | 0  | 291.73 | 0.10         | 30.71 | none      | none        | none     |
| 1m | <chem>C/C(CC\C=C(C)/C)=C\CC/C(C)=C\CN1N=NC(C2=CC=CC=C2)=C1</chem> | 349.52 | 6.98  | -4.54 | 3  | 0  | 311.71 | 0.09         | 30.71 | none      | none        | none     |
| 1n | <chem>C/C(CC\C=C(C)/C)=C\CC/C(C)=C/CN1N=NC(C2=CC=CC=C2)=C1</chem> | 349.52 | 6.98  | -4.54 | 3  | 0  | 311.71 | 0.09         | 30.71 | none      | none        | none     |
| 1o | <chem>C/C(CC\C=C(C)/C)=C\CC/C(C)=C/CN1N=NC(CCCCC)=C1</chem>       | 343.56 | 7.41  | -4.10 | 3  | 0  | 319.25 | 0.09         | 30.71 | none      | none        | none     |
| 1p | <chem>C/C(CC\C=C(C)/C)=C\CC/C(C)=C/CN1N=NC(CCC)=C1</chem>         | 315.50 | 6.50  | -3.56 | 3  | 0  | 291.73 | 0.10         | 30.71 | none      | none        | none     |
| 1q | <chem>C/C(CC/C=C(C)/C)=C\CC/C(C)=C\CN1N=NC(C(OC)=O)=C1</chem>     | 331.46 | 5.20  | -2.93 | 5  | 0  | 291.96 | 0.18         | 57.01 | none      | none        | none     |
| 1r | <chem>C/C(CC\C=C(C)/C)=C\CC/C(C)=C/CN1N=NC(C(OC)=O)=C1</chem>     | 331.46 | 5.20  | -2.93 | 5  | 0  | 291.96 | 0.18         | 57.01 | none      | none        | none     |
| 2a | <chem>C/C(C)=C/CC/C(C)=C\CN1N=NC(CCCCCC)=C1</chem>                | 317.52 | 6.60  | -3.94 | 3  | 0  | 296.04 | 0.10         | 30.71 | none      | none        | none     |
| 2b | <chem>C/C(C)=C/CC/C(C)=C/CN1N=NC(CCCCCC)=C1</chem>                | 317.52 | 6.60  | -3.94 | 3  | 0  | 296.04 | 0.10         | 30.71 | none      | none        | none     |
| 2c | <chem>C/C(C)=C/CC/C(C)=C\CN1N=NC(CCCCC)=C1</chem>                 | 275.44 | 5.24  | -3.13 | 3  | 0  | 254.76 | 0.11         | 30.71 | none      | none        | none     |
| 2d | <chem>C/C(C)=C/CC/C(C)=C/CN1N=NC(CCCCC)=C1</chem>                 | 275.44 | 5.24  | -3.13 | 3  | 0  | 254.76 | 0.11         | 30.71 | none      | none        | none     |
| 2e | <chem>C/C(C)=C/CC/C(C)=C\CN1N=NC(CCC)=C1</chem>                   | 247.39 | 4.33  | -2.59 | 3  | 0  | 227.24 | 0.13         | 30.71 | none      | none        | none     |
| 2f | <chem>C/C(C)=C/CC/C(C)=C/CN1N=NC(CCC)=C1</chem>                   | 247.39 | 4.33  | -2.59 | 3  | 0  | 227.24 | 0.13         | 30.71 | none      | none        | none     |
| 2g | <chem>C/C(C)=C/CC/C(C)=C/CN1N=NC(C(OC)=O)=C1</chem>               | 263.34 | 3.03  | -1.95 | 5  | 0  | 227.47 | 0.23         | 57.01 | none      | none        | none     |
| 2h | <chem>C/C(C)=C/CC/C(C)=C\CN1N=NC(C(OC)=O)=C1</chem>               | 263.34 | 3.03  | -1.95 | 5  | 0  | 227.47 | 0.23         | 57.01 | none      | none        | none     |
| 2i | <chem>C/C(C)=C/CC/C(C)=C/CN1N=NC(C2=CC=CC=C2)=C1</chem>           | 281.40 | 4.81  | -3.57 | 3  | 0  | 247.22 | 0.12         | 30.71 | none      | none        | none     |
| 2j | <chem>C/C(C)=C/CC/C(C)=C\CN1N=NC(C2=CC=CC=C2)=C1</chem>           | 281.40 | 4.81  | -3.57 | 3  | 0  | 247.22 | 0.12         | 30.71 | none      | none        | none     |
| 3a | <chem>C/C(C)=C/CN1N=NC(C(OC)=O)=C1</chem>                         | 195.22 | 0.85  | -0.98 | 5  | 0  | 162.98 | 0.32         | 57.01 | none      | none        | none     |
| 3b | <chem>C/C(C)=C/CN1N=NC(C2=CC=CC=C2)=C1</chem>                     | 213.28 | 2.64  | -2.59 | 3  | 0  | 182.73 | 0.16         | 30.71 | none      | none        | none     |
| 3c | <chem>C/C(C)=C/CN1N=NC(CCC)=C1</chem>                             | 179.27 | 2.15  | -1.61 | 3  | 0  | 162.75 | 0.18         | 30.71 | none      | none        | none     |
| 3d | <chem>C/C(C)=C/CN1N=NC(CCCCC)=C1</chem>                           | 207.32 | 3.06  | -2.15 | 3  | 0  | 190.27 | 0.15         | 30.71 | none      | none        | none     |
| 3e | <chem>C/C(C)=C/CN1N=NC(CCCCCC)=C1</chem>                          | 249.40 | 4.43  | -2.96 | 3  | 0  | 231.55 | 0.12         | 30.71 | none      | none        | none     |

## Physicochemical properties calculated in DATAWARRIOR

| ID  | SMILE                                                  | MW     | cLogP | cLogS | HA | HD | TSA    | Relative PSA | PSA   | Mutagenic | Tumorigenic | Irritant |
|-----|--------------------------------------------------------|--------|-------|-------|----|----|--------|--------------|-------|-----------|-------------|----------|
| 4a  | <chem>CCCCCCCCC2=CN(N=N2)CC1=CC=CC=C1</chem>           | 299.46 | 5.17  | -3.85 | 3  | 0  | 269.60 | 0.11         | 30.71 | none      | none        | none     |
| 4b  | <chem>CCCCCCCCC2=CN(N=N2)CC1=CC=CC=C1</chem>           | 271.41 | 4.26  | -3.31 | 3  | 0  | 242.08 | 0.12         | 30.71 | none      | none        | none     |
| 4c  | <chem>CCCCC2=CN(N=N2)CC1=CC=CC=C1</chem>               | 229.33 | 2.90  | -2.50 | 3  | 0  | 200.80 | 0.14         | 30.71 | none      | none        | none     |
| 4d  | <chem>CCCC2=CN(N=N2)CC1=CC=CC=C1</chem>                | 201.27 | 1.99  | -1.96 | 3  | 0  | 173.28 | 0.17         | 30.71 | none      | none        | none     |
| 4e  | <chem>O=C(C2=CN(N=N2)CC1=CC=CC=C1)O</chem>             | 203.20 | 0.26  | -1.20 | 5  | 1  | 157.60 | 0.35         | 68.01 | none      | none        | none     |
| 4f  | <chem>O=C(C2=CN(N=N2)CC1=CC=CC=C1)OC</chem>            | 217.23 | 0.69  | -1.33 | 5  | 0  | 173.51 | 0.30         | 57.01 | none      | none        | none     |
| 4g  | <chem>C1(CN2N=NC(C3=CC=CC=C3)=C2)=CC=CC=C1</chem>      | 235.29 | 2.48  | -2.94 | 3  | 0  | 193.26 | 0.15         | 30.71 | none      | none        | none     |
| 4h  | <chem>OCC2=CN(N=N2)CC1=CC=CC=C1</chem>                 | 189.22 | 0.18  | -1.07 | 4  | 1  | 153.61 | 0.27         | 50.94 | none      | none        | none     |
| 5a  | <chem>CCOC(CN1N=NC(CCCCCC)=C1)=O</chem>                | 267.37 | 2.72  | -2.43 | 5  | 0  | 236.09 | 0.22         | 57.01 | none      | none        | none     |
| 5b  | <chem>O=C(CN1N=NC(CCCCC)=C1)OCC</chem>                 | 225.29 | 1.36  | -1.62 | 5  | 0  | 194.81 | 0.27         | 57.01 | none      | none        | none     |
| 5c  | <chem>CCOC(CN1N=NC(CCC)=C1)=O</chem>                   | 197.24 | 0.45  | -1.08 | 5  | 0  | 167.29 | 0.31         | 57.01 | none      | none        | none     |
| 5d  | <chem>CCOC(CCN(N=N1)C=C1C(OC)=O)=O</chem>              | 227.22 | -0.40 | -0.72 | 7  | 0  | 181.28 | 0.41         | 83.31 | none      | none        | none     |
| 6a  | <chem>CC(O)c2cn(CCCc1cccc1)nn2</chem>                  | 231.30 | 1.26  | -1.76 | 4  | 1  | 192.13 | 0.22         | 50.94 | none      | none        | none     |
| 6b  | <chem>CCCCCCCCC2=CN(N=N2)CCCC1=CC=CC=C1</chem>         | 327.51 | 5.97  | -4.47 | 3  | 0  | 297.12 | 0.10         | 30.71 | none      | none        | none     |
| 6c  | <chem>CCCC2=CN(N=N2)CCCC1=CC=CC=C1</chem>              | 229.33 | 2.79  | -2.58 | 3  | 0  | 200.80 | 0.14         | 30.71 | none      | none        | none     |
| 6d  | <chem>CCCCC2=CN(N=N2)CCCC1=CC=CC=C1</chem>             | 257.38 | 3.70  | -3.12 | 3  | 0  | 228.32 | 0.13         | 30.71 | none      | none        | none     |
| 6e  | <chem>CCCCCCCCC2=CN(N=N2)CCCC1=CC=CC=C1</chem>         | 299.46 | 5.06  | -3.93 | 3  | 0  | 269.60 | 0.11         | 30.71 | none      | none        | none     |
| 6f  | <chem>O=C(C2=CN(N=N2)CCCC1=CC=CC=C1)OC</chem>          | 245.28 | 1.49  | -1.95 | 5  | 0  | 201.03 | 0.26         | 57.01 | none      | none        | none     |
| 6g  | <chem>C(Cc1cccc1)Cn3cc(c2cccc2)nn3</chem>              | 263.34 | 3.27  | -3.56 | 3  | 0  | 220.78 | 0.13         | 30.71 | none      | none        | none     |
| 6h  | <chem>OCC2=CN(N=N2)CCCC1=CC=CC=C1</chem>               | 217.27 | 0.98  | -1.69 | 4  | 1  | 181.13 | 0.23         | 50.94 | none      | none        | none     |
| 7a  | <chem>OCC1=CN(N=N1)CCCCCCCC</chem>                     | 211.31 | 1.81  | -1.91 | 4  | 1  | 188.67 | 0.22         | 50.94 | none      | none        | none     |
| 7b  | <chem>O=C(OC)C1=CN(N=N1)CCCCCCCC</chem>                | 239.32 | 2.32  | -2.16 | 5  | 0  | 208.57 | 0.25         | 57.01 | none      | none        | none     |
| 8a  | <chem>OCC1=CN(N=N1)CCCCCCCC</chem>                     | 239.36 | 2.72  | -2.45 | 4  | 1  | 216.19 | 0.19         | 50.94 | none      | none        | none     |
| 8b  | <chem>O=C(OC)C1=CN(N=N1)CCCCCCCC</chem>                | 267.37 | 3.23  | -2.70 | 5  | 0  | 236.09 | 0.22         | 57.01 | none      | none        | none     |
| 9a  | <chem>OCC1=CN(N=N1)CCCCCCCCCCCC</chem>                 | 281.44 | 4.08  | -3.26 | 4  | 1  | 257.47 | 0.16         | 50.94 | none      | none        | none     |
| 9b  | <chem>O=C(OC)C1=CN(N=N1)CCCCCCCCCCCC</chem>            | 309.45 | 4.59  | -3.51 | 5  | 0  | 277.37 | 0.19         | 57.01 | none      | none        | none     |
| 10a | <chem>CCCCCCCCC2=CN(N=N2)C/C=C/C1=CC=CC=C1</chem>      | 297.44 | 4.94  | -4.06 | 3  | 0  | 268.58 | 0.11         | 30.71 | none      | none        | none     |
| 10b | <chem>C1(C3=CN(N=N3)C/C=C/C2=CC=CC=C2)=CC=CC=C1</chem> | 261.33 | 3.15  | -3.70 | 3  | 0  | 219.76 | 0.13         | 30.71 | none      | none        | none     |
| 10c | <chem>CCCC2=CN(N=N2)C/C=C/C1=CC=CC=C1</chem>           | 227.31 | 2.66  | -2.71 | 3  | 0  | 199.78 | 0.14         | 30.71 | none      | none        | none     |
| 10d | <chem>CCCCC2=CN(N=N2)C/C=C/C1=CC=CC=C1</chem>          | 255.36 | 3.57  | -3.25 | 3  | 0  | 227.30 | 0.13         | 30.71 | none      | none        | none     |
| 10e | <chem>CCCCCCCCC2=CN(N=N2)C/C=C/C1=CC=CC=C1</chem>      | 325.50 | 5.85  | -4.60 | 3  | 0  | 296.10 | 0.10         | 30.71 | none      | none        | none     |
|     | <b>Max</b>                                             | 385.64 | 8.77  | -0.72 | 7  | 1  | 360.53 | 0.41         | 83.31 | none      | none        | none     |
|     | <b>Min</b>                                             | 179.27 | -0.40 | -4.91 | 3  | 0  | 153.61 | 0.08         | 30.71 | none      | none        | none     |

| ID | SMILE                                                             | OSIRIS        |            | MOLINSPIRATION |       |        |        |     |      |              |        |        |
|----|-------------------------------------------------------------------|---------------|------------|----------------|-------|--------|--------|-----|------|--------------|--------|--------|
|    |                                                                   | Drug likeness | Drug Score | miLogP         | TPSA  | natoms | MW     | nON | nONH | n violations | n rotb | volume |
| 1a | <chem>C/C(CC\C=C(C)/C)=C\CC/C(C)=C/CN1N=NC(CO)=C1</chem>          | -4.63         | 0.36       | 4.8            | 50.95 | 22     | 303.45 | 4   | 1    | 0            | 9      | 318.4  |
| 1b | <chem>C/C(C)=C\CC/C(C)=C/CC/C(C)=C\Cn1nnc(CO)c1</chem>            | -4.63         | 0.36       | 4.8            | 50.95 | 22     | 303.45 | 4   | 1    | 0            | 9      | 318.4  |
| 1c | <chem>C/C(CC\C=C(C)/C)=C\CC/C(C)=C/CN1N=NC(C(C)O)=C1</chem>       | -5.39         | 0.34       | 5.02           | 50.95 | 23     | 317.48 | 4   | 1    | 1            | 9      | 335    |
| 1d | <chem>CC(c1nnn(C/C=C(CC/C=C(CC/C=C(C)\C)\C)/C)c1)O</chem>         | -5.39         | 0.34       | 5.02           | 50.95 | 23     | 317.48 | 4   | 1    | 1            | 9      | 335    |
| 1e | <chem>C/C(CC\C=C(C)/C)=C\CC/C(C)=C/CN1N=NC(C(C)(C)O)=C1</chem>    | -5.35         | 0.3        | 5.61           | 50.95 | 24     | 331.5  | 4   | 1    | 1            | 9      | 351.3  |
| 1f | <chem>C/C(C)=C\CC/C(C)=C/CC/C(C)=C\Cn1nnc(C(C)(O)C)c1</chem>      | -5.35         | 0.3        | 5.61           | 50.95 | 24     | 331.5  | 4   | 1    | 1            | 9      | 351.3  |
| 1g | <chem>C/C(CC\C=C(C)/C)=C\CC/C(C)=C/CN1N=NC(CCO)=C1</chem>         | -6.39         | 0.33       | 5.01           | 50.95 | 23     | 317.48 | 4   | 1    | 1            | 10     | 335.2  |
| 1h | <chem>C/C(C)=C\CC/C(C)=C/CC/C(C)=C\Cn1nnc(CCO)c1</chem>           | -6.39         | 0.33       | 5.01           | 50.95 | 23     | 317.48 | 4   | 1    | 1            | 10     | 335.2  |
| 1i | <chem>C/C(CC\C=C(C)/C)=C\CC/C(C)=C\CN1N=NC(CCCCCC)=C1</chem>      | -21.35        | 0.17       | 8.74           | 30.72 | 28     | 385.64 | 3   | 0    | 1            | 15     | 427.8  |
| 1j | <chem>C/C(CC\C=C(C)/C)=C\CC/C(C)=C/CN1N=NC(CCCCCC)=C1</chem>      | -21.35        | 0.17       | 8.74           | 30.72 | 28     | 385.64 | 3   | 0    | 1            | 15     | 427.8  |
| 1k | <chem>C/C(CC\C=C(C)/C)=C\CC/C(C)=C\CN1N=NC(CCCCC)=C1</chem>       | -13.34        | 0.22       | 7.58           | 30.72 | 25     | 343.56 | 3   | 0    | 1            | 12     | 377.4  |
| 1l | <chem>C/C(CC\C=C(C)/C)=C\CC/C(C)=C\CN1N=NC(CCC)=C1</chem>         | -6.7          | 0.25       | 6.52           | 30.72 | 23     | 315.5  | 3   | 0    | 1            | 10     | 343.8  |
| 1m | <chem>C/C(CC\C=C(C)/C)=C\CC/C(C)=C\CN1N=NC(C2=CC=CC=C2)=C1</chem> | -4.48         | 0.21       | 6.89           | 30.72 | 26     | 349.52 | 3   | 0    | 1            | 9      | 365    |
| 1n | <chem>C/C(CC\C=C(C)/C)=C\CC/C(C)=C/CN1N=NC(C2=CC=CC=C2)=C1</chem> | -4.48         | 0.21       | 6.89           | 30.72 | 26     | 349.52 | 3   | 0    | 1            | 9      | 365    |
| 1o | <chem>C/C(CC\C=C(C)/C)=C\CC/C(C)=C/CN1N=NC(CCCCC)=C1</chem>       | -13.34        | 0.22       | 7.58           | 30.72 | 25     | 343.56 | 3   | 0    | 1            | 12     | 377.4  |
| 1p | <chem>C/C(CC\C=C(C)/C)=C\CC/C(C)=C/CN1N=NC(CCC)=C1</chem>         | -6.7          | 0.25       | 6.52           | 30.72 | 23     | 315.5  | 3   | 0    | 1            | 10     | 343.8  |
| 1q | <chem>C/C(CC/C=C(C)/C)=C\CC/C(C)=C\CN1N=NC(C(OC)=O)=C1</chem>     | -6.32         | 0.32       | 5.29           | 57.02 | 24     | 331.46 | 5   | 0    | 1            | 10     | 338.1  |
| 1r | <chem>C/C(CC\C=C(C)/C)=C\CC/C(C)=C/CN1N=NC(C(OC)=O)=C1</chem>     | -6.32         | 0.32       | 5.29           | 57.02 | 24     | 331.46 | 5   | 0    | 1            | 10     | 338.1  |
| 2a | <chem>C/C(C)=C/CC/C(C)=C\CN1N=NC(CCCCCC)=C1</chem>                | -21.49        | 0.24       | 7.25           | 30.72 | 23     | 317.52 | 3   | 0    | 1            | 12     | 350.2  |
| 2b | <chem>C/C(C)=C/CC/C(C)=C/CN1N=NC(CCCCCC)=C1</chem>                | -21.5         | 0.24       | 7.25           | 30.72 | 23     | 317.52 | 3   | 0    | 1            | 12     | 350.2  |
| 2c | <chem>C/C(C)=C/CC/C(C)=C\CN1N=NC(CCCCC)=C1</chem>                 | -13.49        | 0.33       | 5.74           | 30.72 | 20     | 275.44 | 3   | 0    | 1            | 9      | 299.8  |
| 2d | <chem>C/C(C)=C/CC/C(C)=C/CN1N=NC(CCCCC)=C1</chem>                 | -13.49        | 0.33       | 5.74           | 30.72 | 20     | 275.44 | 3   | 0    | 1            | 9      | 299.8  |
| 2e | <chem>C/C(C)=C/CC/C(C)=C\CN1N=NC(CCC)=C1</chem>                   | -6.85         | 0.39       | 4.67           | 30.72 | 18     | 247.39 | 3   | 0    | 0            | 7      | 266.2  |
| 2f | <chem>C/C(C)=C/CC/C(C)=C/CN1N=NC(CCC)=C1</chem>                   | -6.85         | 0.39       | 4.67           | 30.72 | 18     | 247.39 | 3   | 0    | 0            | 7      | 266.2  |
| 2g | <chem>C/C(C)=C/CC/C(C)=C/CN1N=NC(C(OC)=O)=C1</chem>               | -6.46         | 0.45       | 3.45           | 57.02 | 19     | 263.34 | 5   | 0    | 0            | 7      | 260.6  |
| 2h | <chem>C/C(C)=C/CC/C(C)=C\CN1N=NC(C(OC)=O)=C1</chem>               | -6.46         | 0.45       | 3.45           | 57.02 | 19     | 263.34 | 5   | 0    | 0            | 7      | 260.6  |
| 2i | <chem>C/C(C)=C/CC/C(C)=C/CN1N=NC(C2=CC=CC=C2)=C1</chem>           | -4.62         | 0.34       | 5.05           | 30.72 | 21     | 281.4  | 3   | 0    | 1            | 6      | 287.4  |
| 2j | <chem>C/C(C)=C/CC/C(C)=C\CN1N=NC(C2=CC=CC=C2)=C1</chem>           | -4.62         | 0.34       | 5.05           | 30.72 | 21     | 281.4  | 3   | 0    | 1            | 6      | 287.4  |
| 3a | <chem>C/C(C)=C/CN1N=NC(C(OC)=O)=C1</chem>                         | -4.44         | 0.49       | 1.6            | 57.02 | 14     | 195.22 | 5   | 0    | 0            | 4      | 183    |
| 3b | <chem>C/C(C)=C/CN1N=NC(C2=CC=CC=C2)=C1</chem>                     | -2.36         | 0.49       | 3.2            | 30.72 | 16     | 213.28 | 3   | 0    | 0            | 3      | 209.9  |
| 3c | <chem>C/C(C)=C/CN1N=NC(CCC)=C1</chem>                             | -4.64         | 0.48       | 2.83           | 30.72 | 13     | 179.27 | 3   | 0    | 0            | 4      | 188.6  |
| 3d | <chem>C/C(C)=C/CN1N=NC(CCCCC)=C1</chem>                           | -12.33        | 0.45       | 3.89           | 30.72 | 15     | 207.32 | 3   | 0    | 0            | 6      | 222.2  |
| 3e | <chem>C/C(C)=C/CN1N=NC(CCCCCC)=C1</chem>                          | -20.34        | 0.48       | 5.41           | 30.72 | 18     | 249.4  | 3   | 0    | 1            | 9      | 272.6  |

| ID  | SMILE                                     | OSIRIS        |            | MOLINSPIRATION |       |        |        |     |      |              |        |        |
|-----|-------------------------------------------|---------------|------------|----------------|-------|--------|--------|-----|------|--------------|--------|--------|
|     |                                           | Drug likeness | Drug Score | miLogP         | TPSA  | natoms | MW     | nON | nONH | n violations | n rotb | volume |
| 4a  | CCCCCCCCC2=CN(N=N2)CC1=CC=CC=C1           | -19.85        | 0.31       | 6.33           | 30.72 | 22     | 299.46 | 3   | 0    | 1            | 11     | 317.1  |
| 4b  | CCCCCCCCC2=CN(N=N2)CC1=CC=CC=C1           | -19.85        | 0.37       | 5.33           | 30.72 | 20     | 271.41 | 3   | 0    | 1            | 9      | 283.5  |
| 4c  | CCCCC2=CN(N=N2)CC1=CC=CC=C1               | -11.84        | 0.45       | 3.81           | 30.72 | 17     | 229.33 | 3   | 0    | 0            | 6      | 233.1  |
| 4d  | CCCC2=CN(N=N2)CC1=CC=CC=C1                | -4.15         | 0.48       | 2.74           | 30.72 | 15     | 201.27 | 3   | 0    | 0            | 4      | 199.5  |
| 4e  | O=C(C2=CN(N=N2)CC1=CC=CC=C1)O             | -0.83         | 0.63       | 1.26           | 68.02 | 15     | 203.2  | 5   | 1    | 0            | 3      | 176.3  |
| 4f  | O=C(C2=CN(N=N2)CC1=CC=CC=C1)OC            | -4.08         | 0.49       | 1.52           | 57.02 | 16     | 217.23 | 5   | 0    | 0            | 4      | 193.8  |
| 4g  | C1(CN2N=NC(C3=CC=CC=C3)=C2)=CC=CC=C1      | -1.77         | 0.51       | 3.12           | 30.72 | 18     | 235.29 | 3   | 0    | 0            | 3      | 220.7  |
| 4h  | OCC2=CN(N=N2)CC1=CC=CC=C1                 | -2.02         | 0.54       | 1.02           | 50.95 | 14     | 189.22 | 4   | 1    | 0            | 3      | 174.1  |
| 5a  | CCOC(CN1N=NC(CCCCCC)=C1)=O                | -25.4         | 0.45       | 3.97           | 57.02 | 19     | 267.37 | 5   | 0    | 0            | 11     | 273.4  |
| 5b  | O=C(CN1N=NC(CCCC)=C1)OCC                  | -17.39        | 0.38       | 2.45           | 57.02 | 16     | 225.29 | 5   | 0    | 0            | 8      | 223    |
| 5c  | CCOC(CN1N=NC(CCC)=C1)=O                   | -9.7          | 0.49       | 1.39           | 57.02 | 14     | 197.24 | 5   | 0    | 0            | 6      | 189.4  |
| 5d  | CCOC(CCN(N=N1)C=C1C(OC)=O)=O              | 14.35         | 0.49       | 0.12           | 83.33 | 16     | 227.22 | 7   | 0    | 0            | 7      | 200.6  |
| 6a  | CC(O)c2cn(CCCc1cccc1)nn2                  | -3.48         | 0.49       | 1.98           | 50.95 | 17     | 231.3  | 4   | 1    | 0            | 5      | 224.3  |
| 6b  | CCCCCCCCC2=CN(N=N2)CCCC1=CC=CC=C1         | -19.41        | 0.25       | 7.06           | 30.72 | 24     | 327.52 | 3   | 0    | 1            | 13     | 350.7  |
| 6c  | CCCC2=CN(N=N2)CCCC1=CC=CC=C1              | -4.76         | 0.45       | 3.47           | 30.72 | 17     | 229.33 | 3   | 0    | 0            | 6      | 233.1  |
| 6d  | CCCCC2=CN(N=N2)CCCC1=CC=CC=C1             | -11.4         | 0.41       | 4.54           | 30.72 | 19     | 257.38 | 3   | 0    | 0            | 8      | 266.7  |
| 6e  | CCCCCCCCC2=CN(N=N2)CCCC1=CC=CC=C1         | -19.41        | 0.31       | 6.05           | 30.72 | 22     | 299.46 | 3   | 0    | 1            | 11     | 317.1  |
| 6f  | O=C(C2=CN(N=N2)CCCC1=CC=CC=C1)OC          | -4.77         | 0.47       | 2.25           | 57.02 | 18     | 245.28 | 5   | 0    | 0            | 6      | 227.4  |
| 6g  | C(Cc1cccc1)Cn3cc(c2cccc2)nn3              | -2.52         | 0.44       | 3.85           | 30.72 | 20     | 263.34 | 3   | 0    | 0            | 5      | 254.3  |
| 6h  | OCC2=CN(N=N2)CCCC1=CC=CC=C1               | -2.73         | 0.51       | 1.75           | 50.95 | 16     | 217.27 | 4   | 1    | 0            | 5      | 207.7  |
| 7a  | OCC1=CN(N=N1)CCCCCCCC                     | -19.85        | 0.47       | 2.89           | 50.95 | 15     | 211.31 | 4   | 1    | 0            | 8      | 220.1  |
| 7b  | O=C(OC)C1=CN(N=N1)CCCCCCCC                | -21.86        | 0.46       | 3.38           | 57.02 | 17     | 239.32 | 5   | 0    | 0            | 9      | 239.8  |
| 8a  | OCC1=CN(N=N1)CCCCCCCC                     | -19.85        | 0.45       | 3.9            | 50.95 | 17     | 239.36 | 4   | 1    | 0            | 10     | 253.7  |
| 8b  | O=C(OC)C1=CN(N=N1)CCCCCCCC                | -21.86        | 0.43       | 4.39           | 57.02 | 19     | 267.37 | 5   | 0    | 0            | 11     | 273.4  |
| 9a  | OCC1=CN(N=N1)CCCCCCCCCCCC                 | -19.85        | 0.38       | 5.42           | 50.95 | 20     | 281.44 | 4   | 1    | 1            | 13     | 304.1  |
| 9b  | O=C(OC)C1=CN(N=N1)CCCCCCCCCCCC            | -21.86        | 0.35       | 5.91           | 57.02 | 22     | 309.45 | 5   | 0    | 1            | 14     | 323.8  |
| 10a | CCCCCCCCC2=CN(N=N2)C/C=C/C1=CC=CC=C1      | -20.31        | 0.31       | 6.08           | 30.72 | 22     | 297.45 | 3   | 0    | 1            | 10     | 310.9  |
| 10b | C1(C3=CN(N=N3)C/C=C/C2=CC=CC=C2)=CC=CC=C1 | -3.28         | 0.42       | 3.88           | 30.72 | 20     | 261.33 | 3   | 0    | 0            | 4      | 248.1  |
| 10c | CCCC2=CN(N=N2)C/C=C/C1=CC=CC=C1           | -5.61         | 0.45       | 3.5            | 30.72 | 17     | 227.31 | 3   | 0    | 0            | 5      | 226.9  |
| 10d | CCCCC2=CN(N=N2)C/C=C/C1=CC=CC=C1          | -13.3         | 0.41       | 4.57           | 30.72 | 19     | 255.37 | 3   | 0    | 0            | 7      | 260.5  |
| 10e | CCCCCCCCC2=CN(N=N2)C/C=C/C1=CC=CC=C1      | -20.31        | 0.25       | 7.09           | 30.72 | 24     | 325.5  | 3   | 0    | 1            | 12     | 344.5  |
|     | <b>Max</b>                                | 14.35         | 0.63       | 8.74           | 83.33 | 28     | 385.64 | 7   | 1    | 1            | 15     | 427.8  |
|     | <b>Min</b>                                | -25.4         | 0.17       | 0.12           | 30.72 | 13     | 179.27 | 3   | 0    | 0            | 3      | 174.1  |

Physicochemical properties of active compounds

| DATAWARRIOR |                                                              |         |        |        |    |    |        |              |       |           |             |          |
|-------------|--------------------------------------------------------------|---------|--------|--------|----|----|--------|--------------|-------|-----------|-------------|----------|
| ID          | SMILE                                                        | MW      | cLogP  | cLogS  | HA | HD | TSA    | Relative PSA | PSA   | Mutagenic | Tumorigenic | Irritant |
| 1f          | <chem>C/C(C)=C\CC/C(C)=C/CC/C(C)=C\Cn1nnc(C(C)(O)C)c1</chem> | 331.502 | 5.56   | -3.158 | 4  | 1  | 293.23 | 0.14293      | 50.94 | none      | none        | none     |
| 1g          | <chem>C/C(CC\C=C(C)/C)=C\CC/C(C)=C/CN1N=NC(CCO)=C1</chem>    | 317.475 | 5.117  | -2.785 | 4  | 1  | 285.82 | 0.14663      | 50.94 | none      | none        | none     |
| 1o          | <chem>C/C(CC\C=C(C)/C)=C\CC/C(C)=C/CN1N=NC(CCCCC)=C1</chem>  | 343.557 | 7.407  | -4.102 | 3  | 0  | 319.25 | 0.090243     | 30.71 | none      | none        | none     |
| 3a          | <chem>C/C(C)=C/CN1N=NC(C(OC)=O)=C1</chem>                    | 195.221 | 0.854  | -0.978 | 5  | 0  | 162.98 | 0.31814      | 57.01 | none      | none        | none     |
| 4a          | <chem>CCCCCCCCC2=CN(N=N2)CC1=CC=CC=C1</chem>                 | 299.46  | 5.174  | -3.849 | 3  | 0  | 269.6  | 0.10686      | 30.71 | none      | none        | none     |
| 5d          | <chem>CCOC(CCN(N=N1)C=C1C(OC)=O)=O</chem>                    | 227.219 | -0.397 | -0.715 | 7  | 0  | 181.28 | 0.41312      | 83.31 | none      | none        | none     |
| 6c          | <chem>CCCC2=CN(N=N2)CCCC1=CC=CC=C1</chem>                    | 229.326 | 2.788  | -2.579 | 3  | 0  | 200.8  | 0.14348      | 30.71 | none      | none        | none     |
| 6d          | <chem>CCCCC2=CN(N=N2)CCCC1=CC=CC=C1</chem>                   | 257.38  | 3.697  | -3.119 | 3  | 0  | 228.32 | 0.12618      | 30.71 | none      | none        | none     |
| 7a          | <chem>OCC1=CN(N=N1)CCCCCCCC</chem>                           | 211.308 | 1.807  | -1.905 | 4  | 1  | 188.67 | 0.22213      | 50.94 | none      | none        | none     |
| 8b          | <chem>O=C(OC)C1=CN(N=N1)CCCCCCCC</chem>                      | 267.372 | 3.226  | -2.702 | 5  | 0  | 236.09 | 0.21962      | 57.01 | none      | none        | none     |
| 10a         | <chem>CCCCCCCCC2=CN(N=N2)C/C=C/C1=CC=CC=C1</chem>            | 297.444 | 4.936  | -4.064 | 3  | 0  | 268.58 | 0.10727      | 30.71 | none      | none        | none     |
| 10b         | <chem>C1(C3=CN(N=N3)C/C=C/C2=CC=CC=C2)=CC=CC=C1</chem>       | 261.327 | 3.147  | -3.695 | 3  | 0  | 219.76 | 0.1311       | 30.71 | none      | none        | none     |
| 10c         | <chem>CCCC2=CN(N=N2)C/C=C/C1=CC=CC=C1</chem>                 | 227.31  | 2.664  | -2.714 | 3  | 0  | 199.78 | 0.14421      | 30.71 | none      | none        | none     |
|             | <b>Max</b>                                                   | 343.557 | 7.407  | -0.715 | 7  | 1  | 319.25 | 0.41312      | 83.31 | none      | none        | none     |
|             | <b>Min</b>                                                   | 195.221 | -0.397 | -4.102 | 3  | 0  | 162.98 | 0.090243     | 30.71 | none      | none        | none     |

| ID  | SMILE                                                        | OSIRIS        |            | MOLINSPIRATION |       |        |        |     |      |              |        |        |
|-----|--------------------------------------------------------------|---------------|------------|----------------|-------|--------|--------|-----|------|--------------|--------|--------|
|     |                                                              | Drug likeness | Drug Score | miLogP         | TPSA  | natoms | MW     | nON | nONH | n violations | n rotb | volume |
| 1f  | <chem>C/C(C)=C\CC/C(C)=C/CC/C(C)=C\Cn1nnc(C(C)(O)C)c1</chem> | -5.35         | 0.3        | 5.61           | 50.95 | 24     | 331.5  | 4   | 1    | 1            | 9      | 351.3  |
| 1g  | <chem>C/C(CC\C=C(C)/C)=C\CC/C(C)=C/CN1N=NC(CCO)=C1</chem>    | -6.39         | 0.33       | 5.01           | 50.95 | 23     | 317.48 | 4   | 1    | 1            | 10     | 335.2  |
| 1o  | <chem>C/C(CC\C=C(C)/C)=C\CC/C(C)=C/CN1N=NC(CCCCC)=C1</chem>  | -13.34        | 0.22       | 7.58           | 30.72 | 25     | 343.56 | 3   | 0    | 1            | 12     | 377.4  |
| 3a  | <chem>C/C(C)=C/CN1N=NC(C(OC)=O)=C1</chem>                    | -4.44         | 0.49       | 1.6            | 57.02 | 14     | 195.22 | 5   | 0    | 0            | 4      | 183    |
| 4a  | <chem>CCCCCCCCC2=CN(N=N2)CC1=CC=CC=C1</chem>                 | -19.85        | 0.31       | 6.33           | 30.72 | 22     | 299.46 | 3   | 0    | 1            | 11     | 317.1  |
| 5d  | <chem>CCOC(CCN(N=N1)C=C1C(OC)=O)=O</chem>                    | 14.35         | 0.49       | 0.12           | 83.33 | 16     | 227.22 | 7   | 0    | 0            | 7      | 200.6  |
| 6c  | <chem>CCCC2=CN(N=N2)CCCC1=CC=CC=C1</chem>                    | -4.76         | 0.45       | 3.47           | 30.72 | 17     | 229.33 | 3   | 0    | 0            | 6      | 233.1  |
| 6d  | <chem>CCCCC2=CN(N=N2)CCCC1=CC=CC=C1</chem>                   | -11.4         | 0.41       | 4.54           | 30.72 | 19     | 257.38 | 3   | 0    | 0            | 8      | 266.7  |
| 7a  | <chem>OCC1=CN(N=N1)CCCCCCCC</chem>                           | -19.85        | 0.47       | 2.89           | 50.95 | 15     | 211.31 | 4   | 1    | 0            | 8      | 220.1  |
| 8b  | <chem>O=C(OC)C1=CN(N=N1)CCCCCCCC</chem>                      | -21.86        | 0.43       | 4.39           | 57.02 | 19     | 267.37 | 5   | 0    | 0            | 11     | 273.4  |
| 10a | <chem>CCCCCCCCC2=CN(N=N2)C/C=C/C1=CC=CC=C1</chem>            | -20.31        | 0.31       | 6.08           | 30.72 | 22     | 297.45 | 3   | 0    | 1            | 10     | 310.9  |
| 10b | <chem>C1(C3=CN(N=N3)C/C=C/C2=CC=CC=C2)=CC=CC=C1</chem>       | -3.28         | 0.42       | 3.88           | 30.72 | 20     | 261.33 | 3   | 0    | 0            | 4      | 248.1  |
| 10c | <chem>CCCC2=CN(N=N2)C/C=C/C1=CC=CC=C1</chem>                 | -5.61         | 0.45       | 3.5            | 30.72 | 17     | 227.31 | 3   | 0    | 0            | 5      | 226.9  |
|     | <b>Max</b>                                                   | 14.35         | 0.49       | 7.58           | 83.33 | 25     | 343.56 | 7   | 1    | 1            | 12     | 377.4  |
|     | <b>Min</b>                                                   | -21.86        | 0.22       | 0.12           | 30.72 | 14     | 195.22 | 3   | 0    | 0            | 4      | 183    |
